# Supplementary material
Source: PubMed Central journal article supplement (PMC2670982)
Supplement: NIHMS103256-supplement-1.pdf [file NIHMS103256-supplement-1.pdf]

## **Somatic Mutations in the Angiopoietin-Receptor TIE2 Can Cause Both Solitary and Multiple Sporadic Venous Malformations**

Nisha Limaye<sup>1\*</sup>, Vinciane Wouters<sup>1\*</sup>, Melanie Uebelhoer<sup>1#</sup>, Marjut Tuominen<sup>2#</sup>, Riikka Wirkkala<sup>2</sup>, John B. Mulliken<sup>3</sup>, Lauri Eklund<sup>2</sup>, Laurence M. Boon<sup>1,4</sup>, and Miikka Vikkula<sup>1</sup>

<sup>1</sup> de Duve Institute, Université catholique de Louvain, Brussels, Belgium; <sup>2</sup>Oulu Center for Cell-Matrix Research, Biocenter Oulu and Department of Medical Biochemistry and Molecular Biology, University of Oulu, Finland; <sup>3</sup> Department of Plastic Surgery, Children's Hospital and Harvard Medical School, Boston, MA, USA; <sup>4</sup> Center for Vascular Anomalies, Division of Plastic Surgery, Cliniques Universitaires St-Luc, Université catholique de Louvain, Brussels, Belgium.

\* and # : These authors contributed equally to this work.

### Corresponding author's name:

Pr. Miikka Vikkula, Laboratory of Human Molecular Genetics, de Duve Institute, Université catholique de Louvain, Ave. Hippocrate 74, B-1200, Brussels, Belgium.

e-mail : miikka.vikkula@uclouvain.be

a.

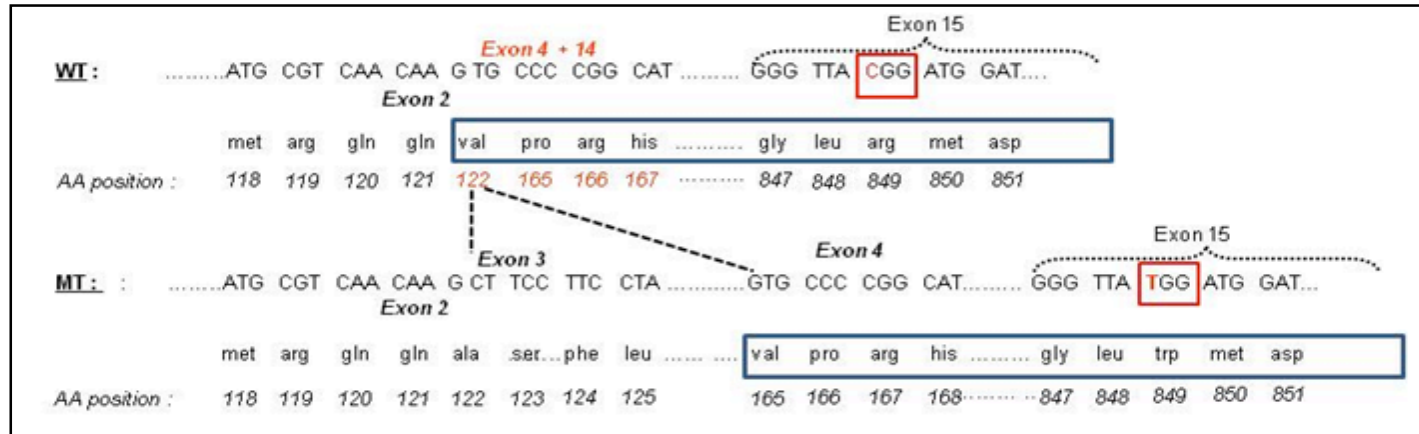

b.

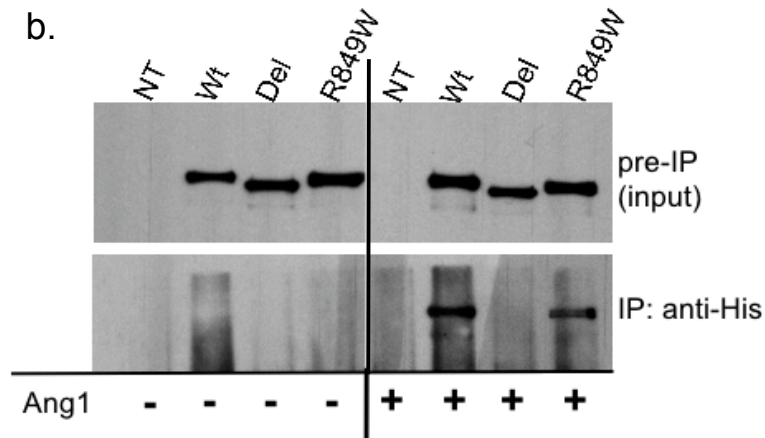

c.

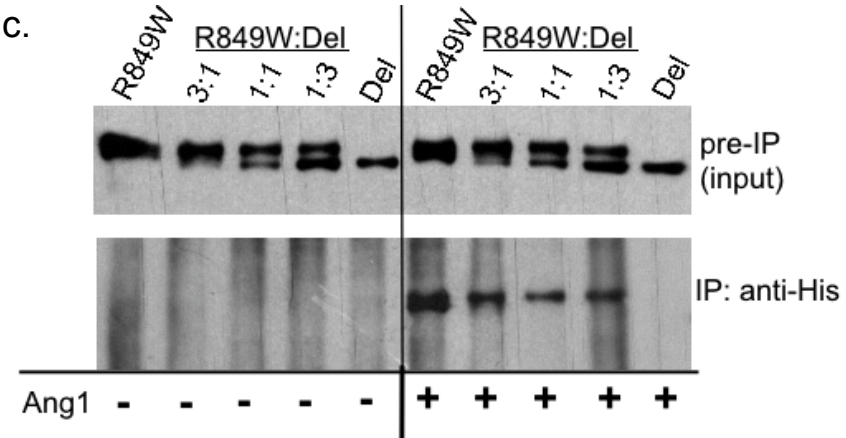

### Supplementary Figure 1: Somatic deletion of part of TIE2 *Ig2* in a VMCM.

(a) Nucleotide and amino acid sequence-alignments of WT and R849W (MT) alleles in Sa-I.4 lesion. Somatic deletion of exon 3 and first 14 nucleotides of exon 4 occurs on WT allele (CGG i.e. R849 in exon 15), and results in loss of 43 amino acids (A122 to S164) within *Ig2* ligand-binding domain. MT (TGG, i.e. 849W) does not contain this deletion.

(b-c) Western blots for TIE2, on lysates from Cos-7 cells transfected with (b) WT, R849W, or Del-TIE2, or (c) various ratios of R849W:Del mutants. NT: Non-transfected controls. Cells incubated with ("Ang1 +" lanes) or without ("Ang1 -" lanes) His-tagged Ang1, and immunoprecipitated using anti-His antibody, to assess for ligand-binding. Pre-IP input whole cell lysates in upper panels, show robust TIE2 expression of all expressed forms; 43 amino-acid size difference allows for discrimination between co-expressed R849W and Del-TIE2. Bead-bound immunoprecipitates in lower panels show TIE2 co-immunoprecipitated by anti-His antibody only when bound to His-Ang1 (Ang1 "+" compared to Ang1 "-" lanes), with exception of Del, which fails to co-immunoprecipitate with His-Ang1 (b, Ang1 "+" lane 3, and c. Ang1 "+" lane 5, absence of lower [Del], lanes 1-4).

d.

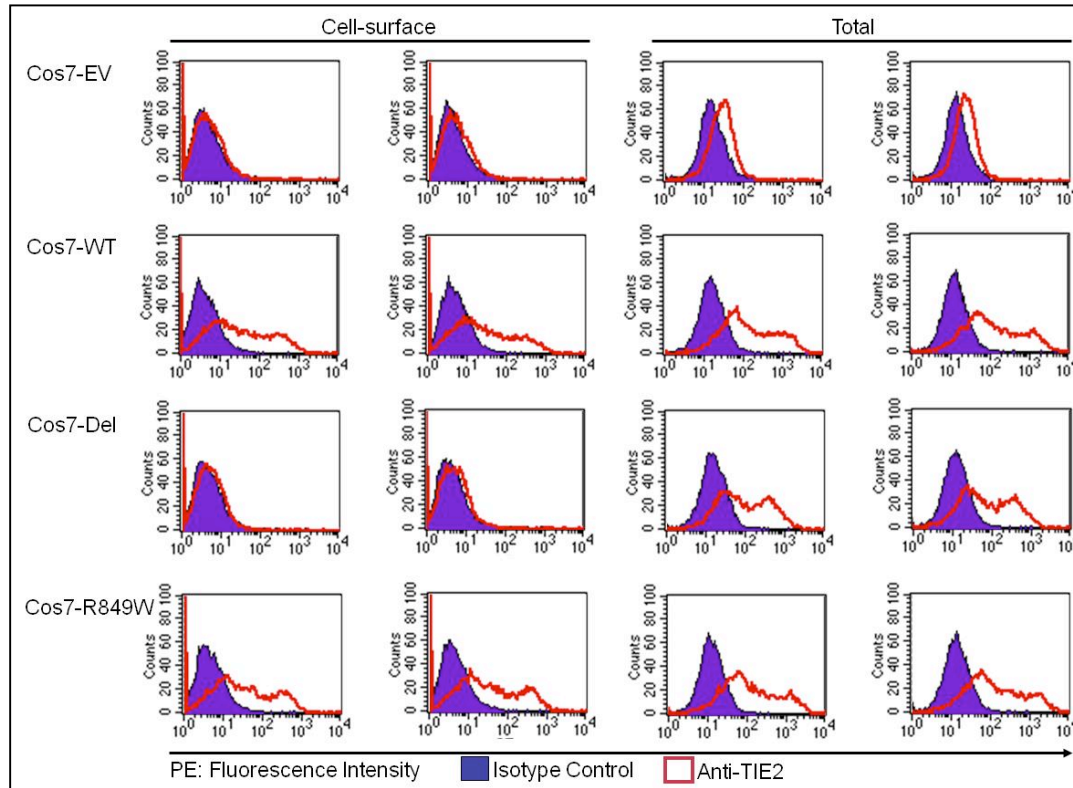

e.

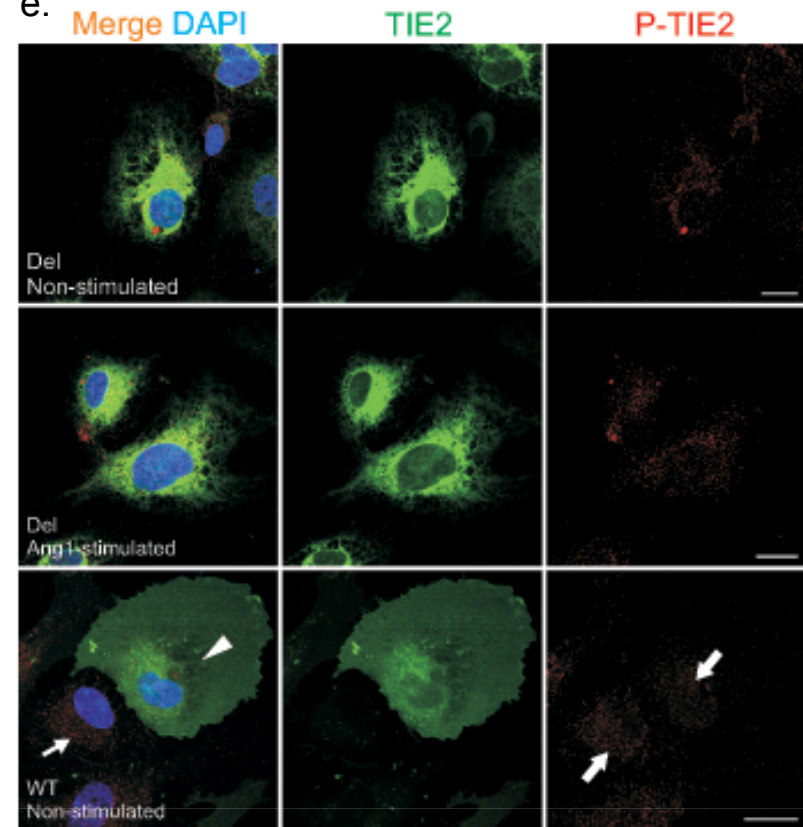

### Supplementary Figure 1: Somatic deletion of part of TIE2 *Ig2* in a VMCM.

(d) Flow cytometry histograms showing cell-surface (left panels) and total (intracellular + cell surface; right panels) TIE2 staining, carried out on duplicate transfections of EV, WT, R849W, or Del in Cos-7 cells.

(e) Del-TIE2 accumulated in ER, and not clustered or activated by Ang1. Sparse HUVECs expressing TIE2-Del stimulated for one hour with Ang1 or left unstimulated, and stained with antibodies against total TIE2 (TIE2) and phosphorylated TIE2 (P-TIE2) (top & middle panels). TIE2 remained accumulated in perinuclear area, and did not show any increase in phosphorylation with Ang1-treatment. Same background staining (thick arrows) observed in WT-TIE2 low (small arrow) and high (arrowhead) expressing HUVECs, indicating that P-TIE2 antibody does not cross-react with unphosphorylated TIE2 (bottom panel). Scale bar 20  $\mu$ m.

**Supplementary Figure 2. Screening and identification of TIE2 mutations in VMs**

**a. L914F: 2740 c>t**

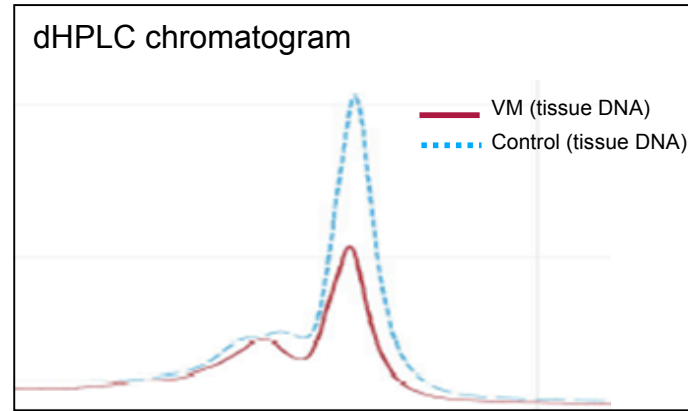

L914F-allele-specific PCR

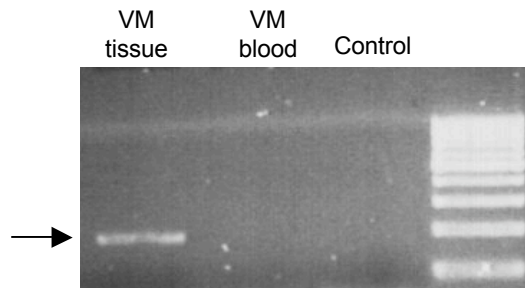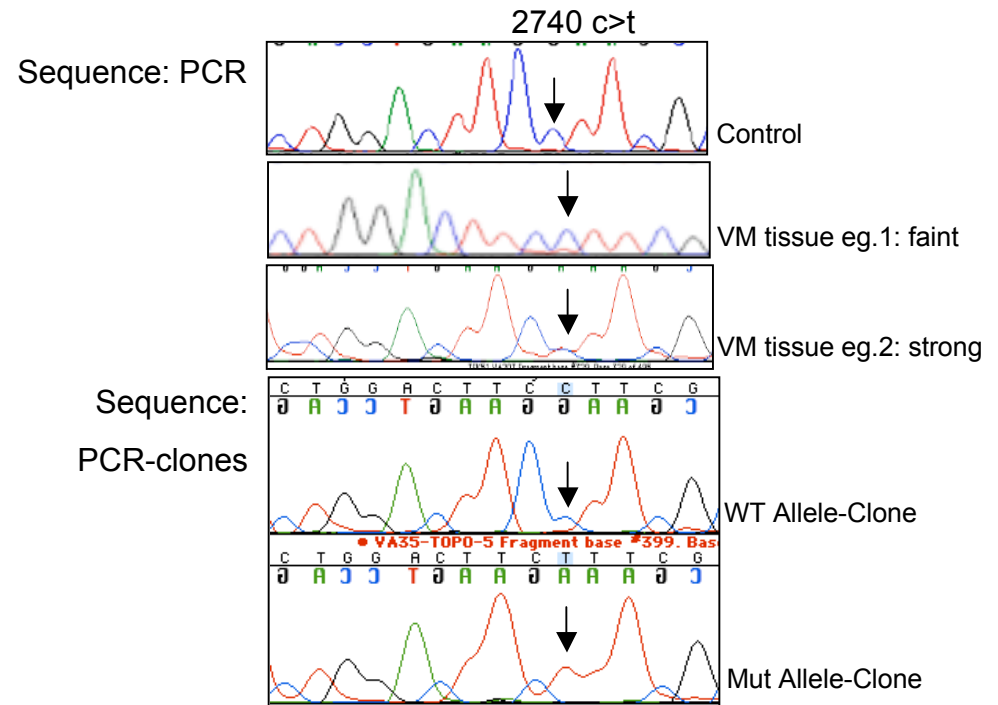

## Supplementary Figure 2. Screening and identification of TIE2 mutations in VMs

### b. Y897H (2689 t>c)+ R915C (2743 c>t)

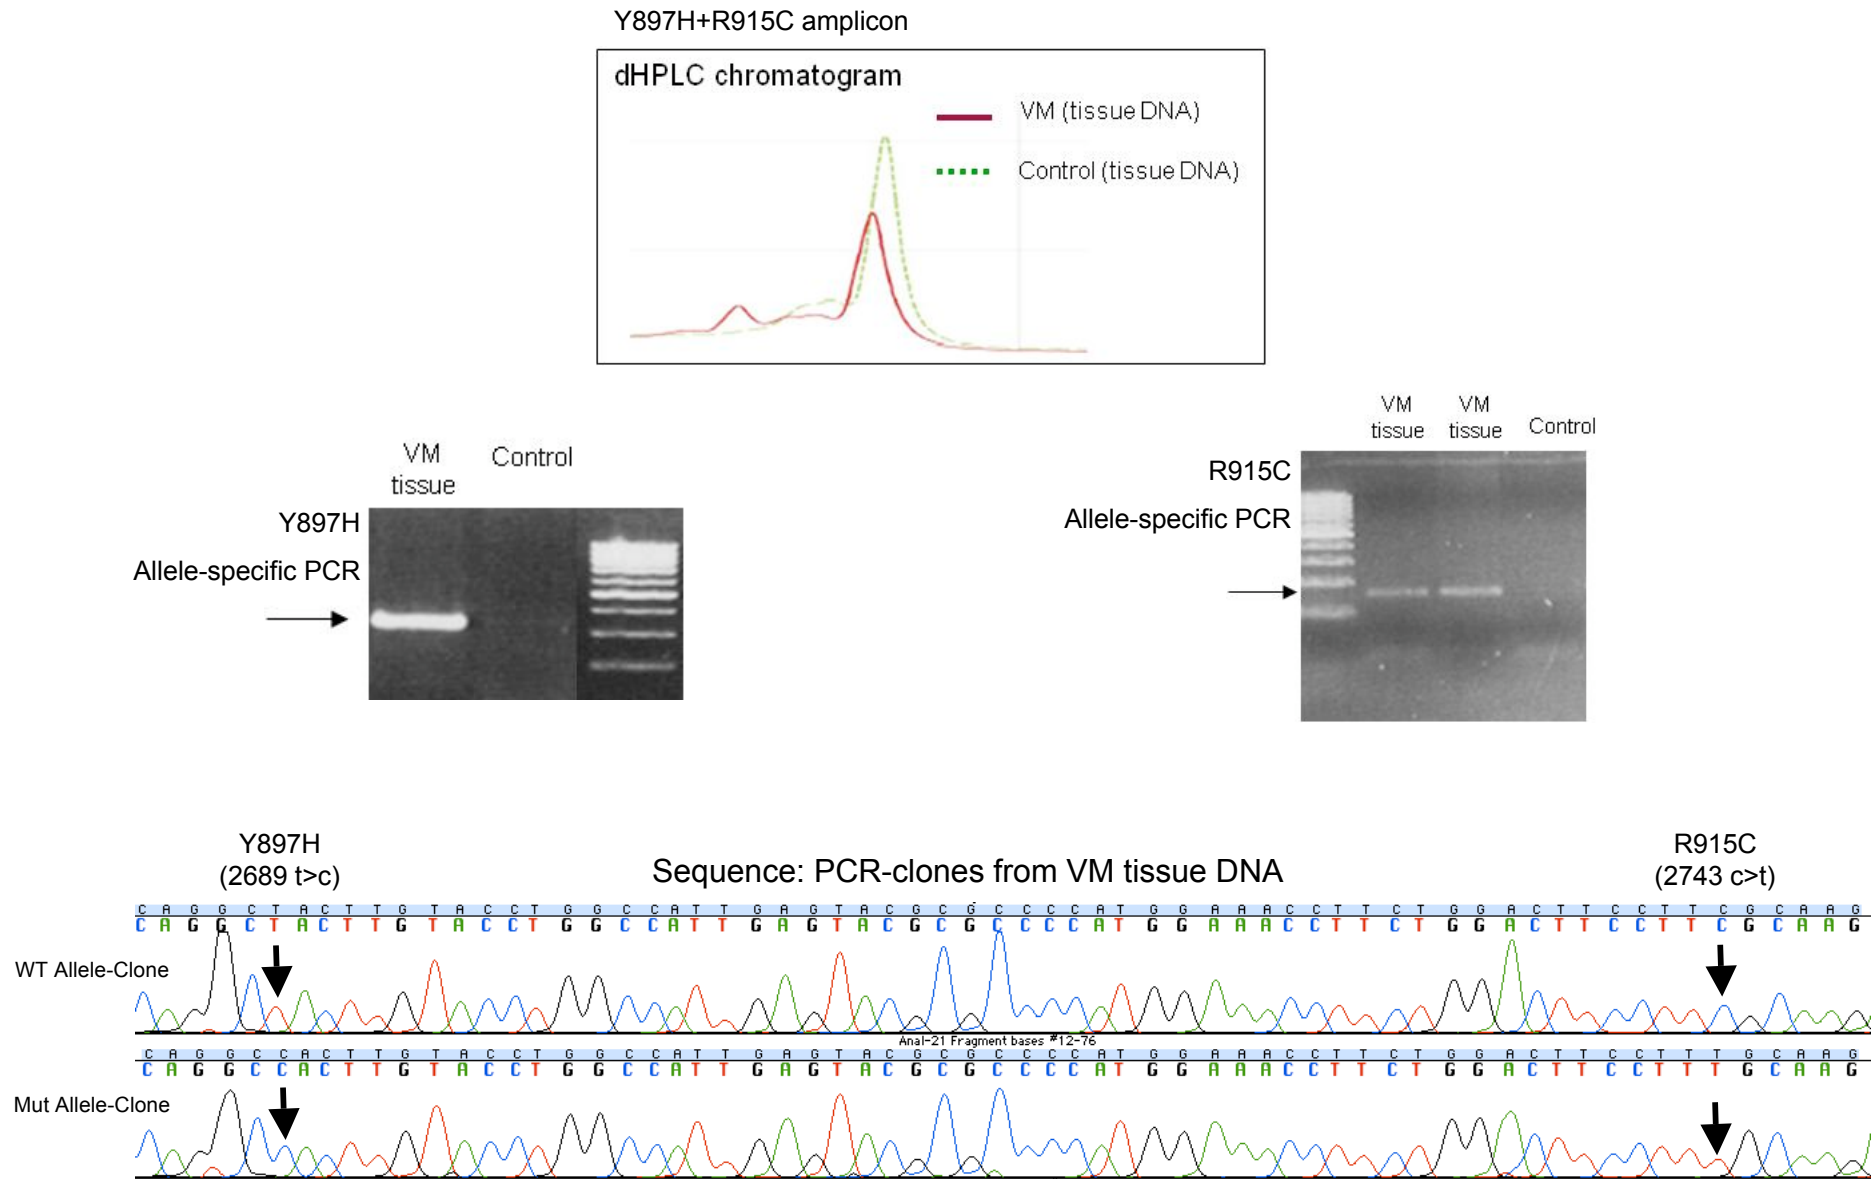

**Supplementary Figure 2. Screening and identification of TIE2 mutations in VMs**

**c. Y897C (2690 a>g)+ R915C (2743 c>t)**

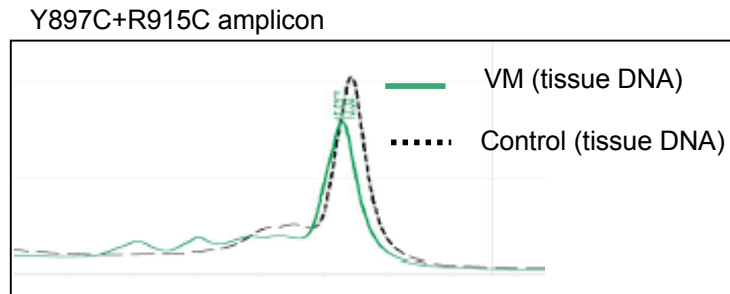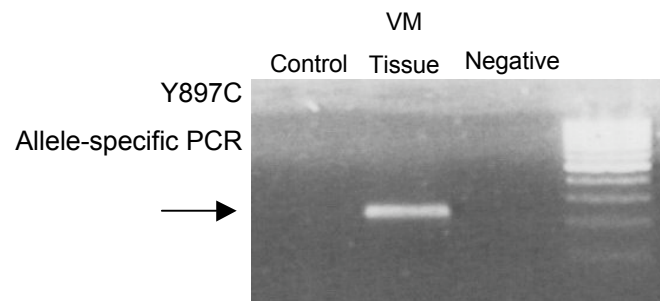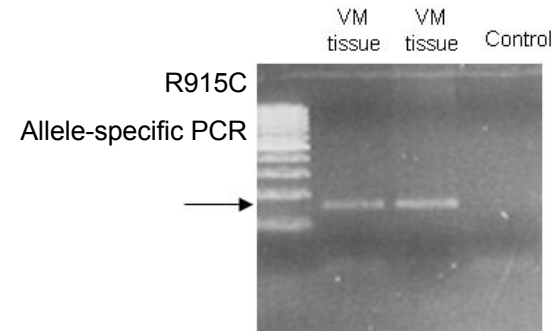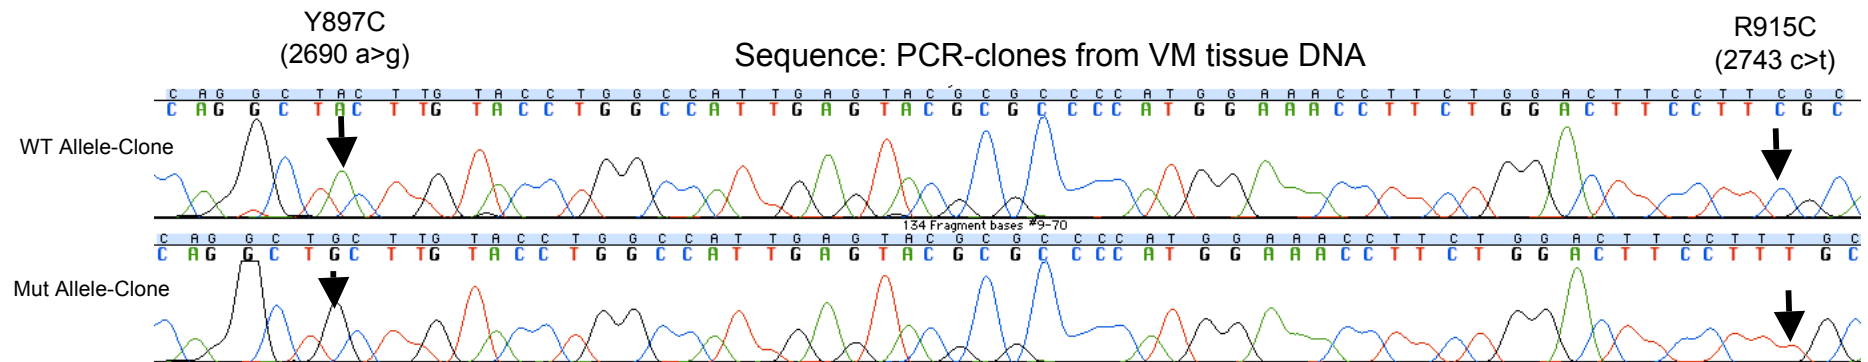

**Supplementary Figure 2. Screening and identification of TIE2 mutations in VMs**  
**d. Y897S (2690 a>c)+ S917I (2750 g>t)**

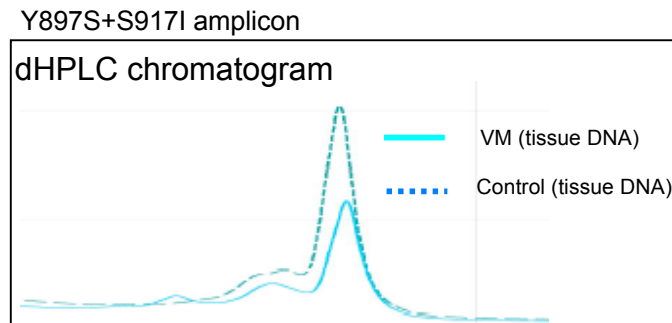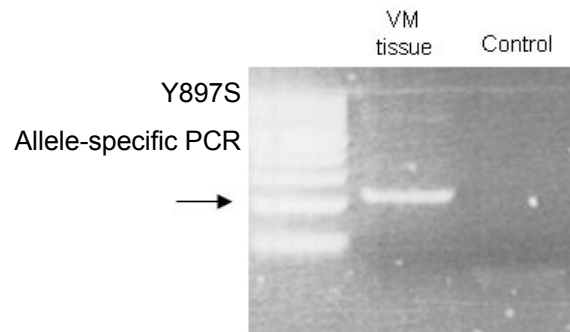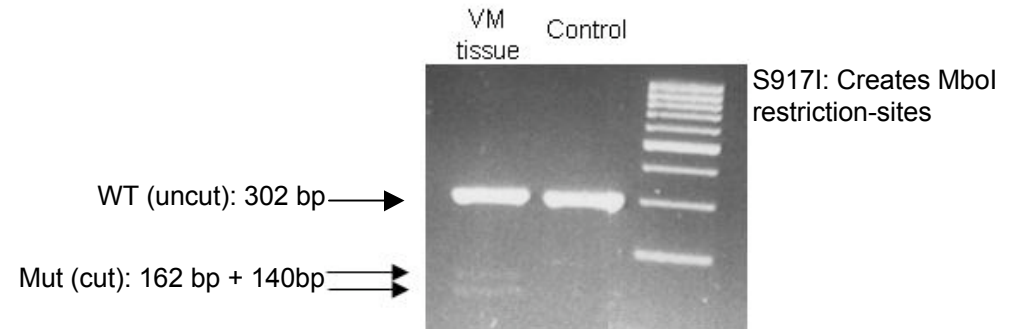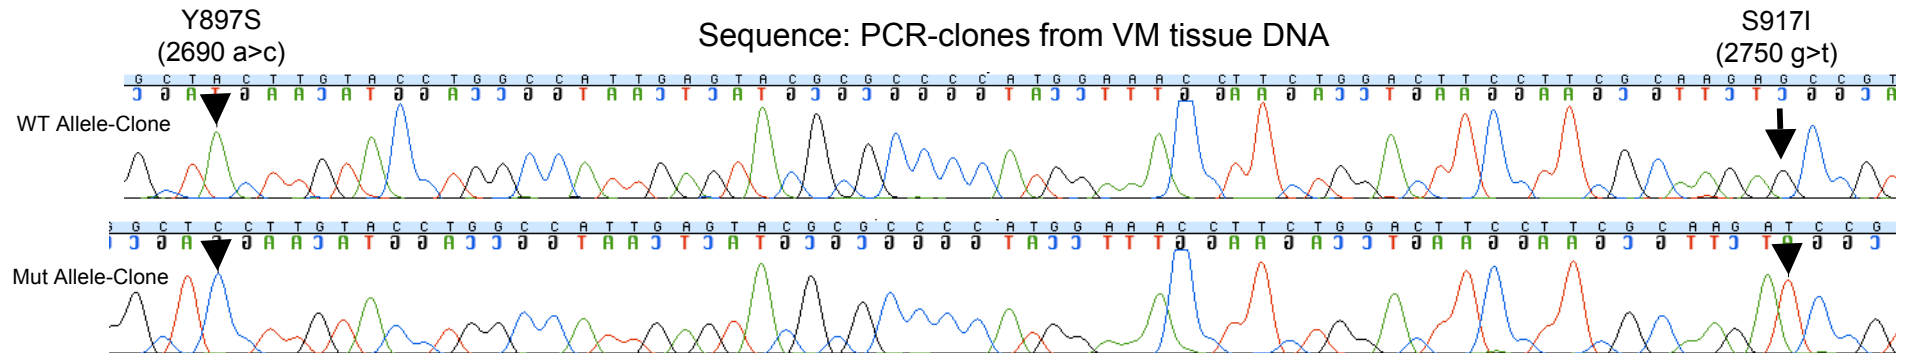

**Supplementary Figure 2. Screening and identification of TIE2 mutations in VMs**

**e. Y897F (2690 a>t)+ R915L (2744 g>t)**

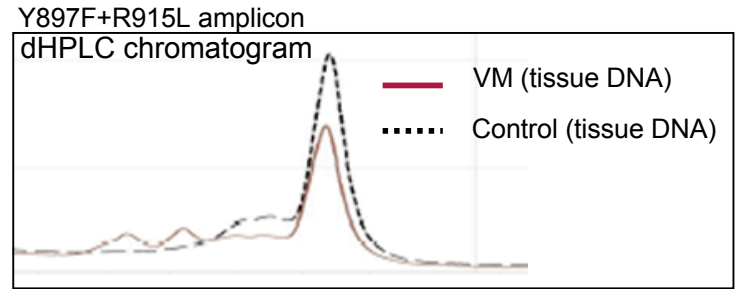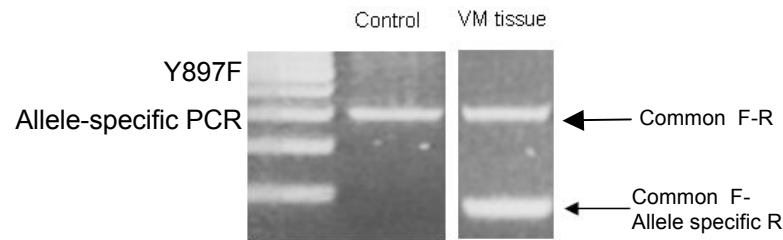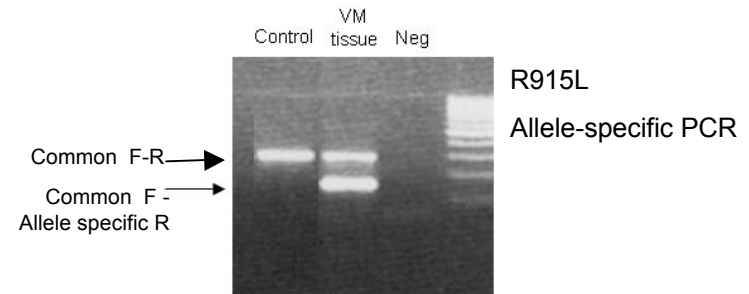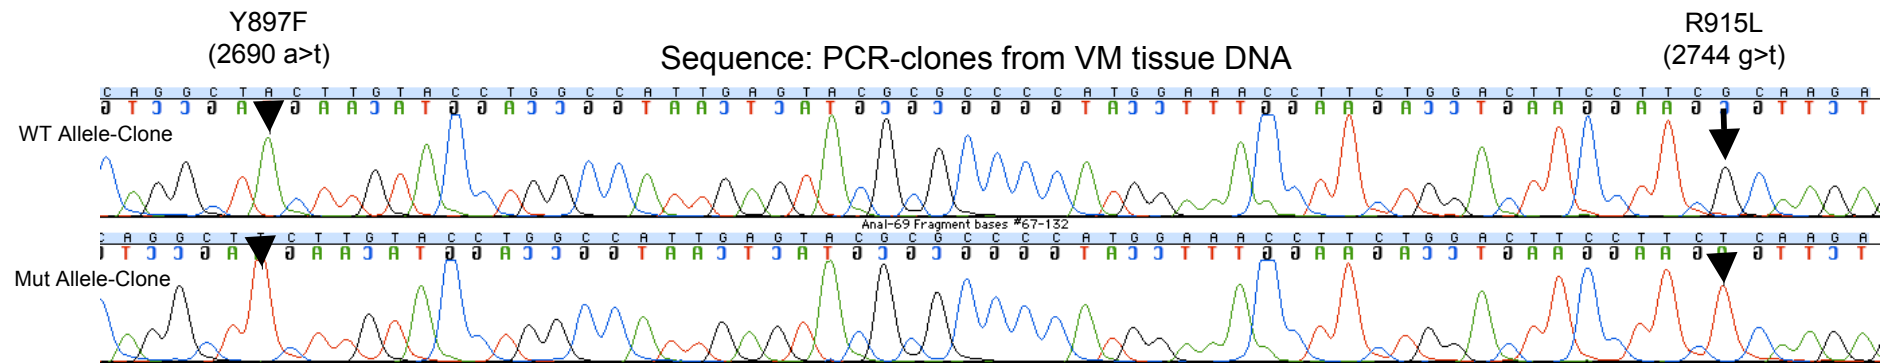



**Supplementary Figure 2. (a-e) Screening and identification of TIE2 mutations in VMs. (a) L914F, (b-e) TIE2 double *cis*-mutations.** dHPLC chromatograms show abnormal elution patterns of exon 17 amplicons from samples containing TIE2 mutations, as compared to controls. Agarose gels show allele-specific PCRs or restriction-digests (S917I) used to discriminate between wild-type and mutant alleles in each case. Most allele-specific PCRs combined a common primer with an allele-specific primer, resulting in one band; where two bands are observed (Y897F and R915L), PCR was carried out using a common forward and reverse, competing with a third allele-specific primer: the common and allele-specific products are discriminated by size. Arrows indicate position of positive (mutant-specific) bands. Sequence data show nucleotide changes identified (indicated above chromatograms, arrows indicate mutated-peak position). For frequent L914F change, PCR-product sequence from tissues with high (weak mutant-signal) and low (strong mutant-signal) levels of tissue heterogeneity shown, along with sequences of wild-type vs. mutant PCR-clones. Sequences of PCR-clones from tissues carrying each double-mutant combination, show them occurring in *cis* (on the same allele).

Supplementary Figure 3. SNaPshot data showing allele peaks for each TIE2 mutation

a. SNaPshot Assay, L914F Forward: c>t

Plasmid Controls:

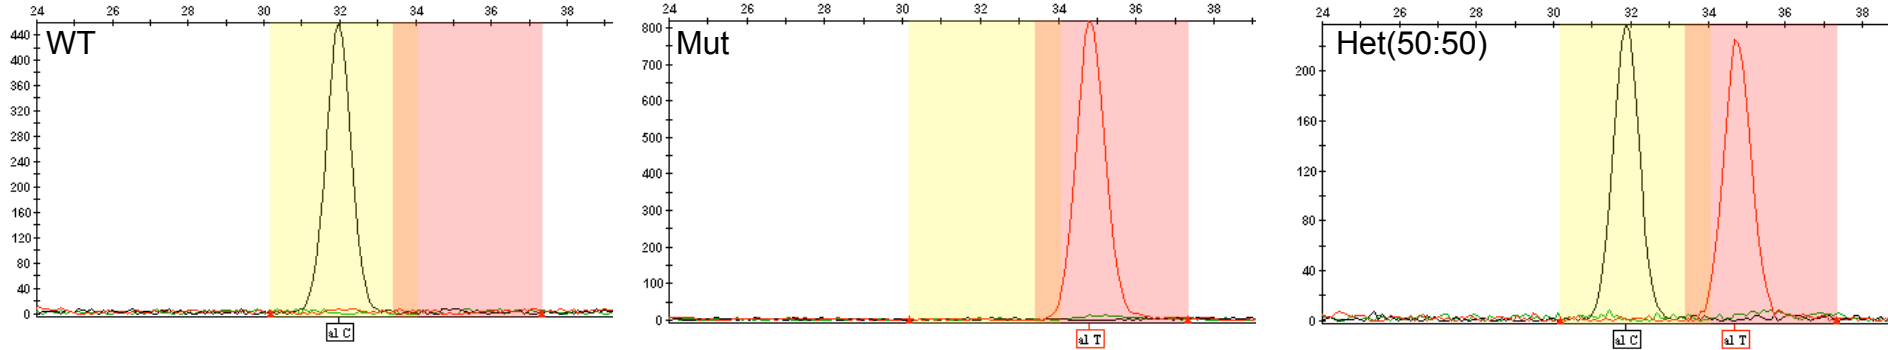

VM Tissue (4)

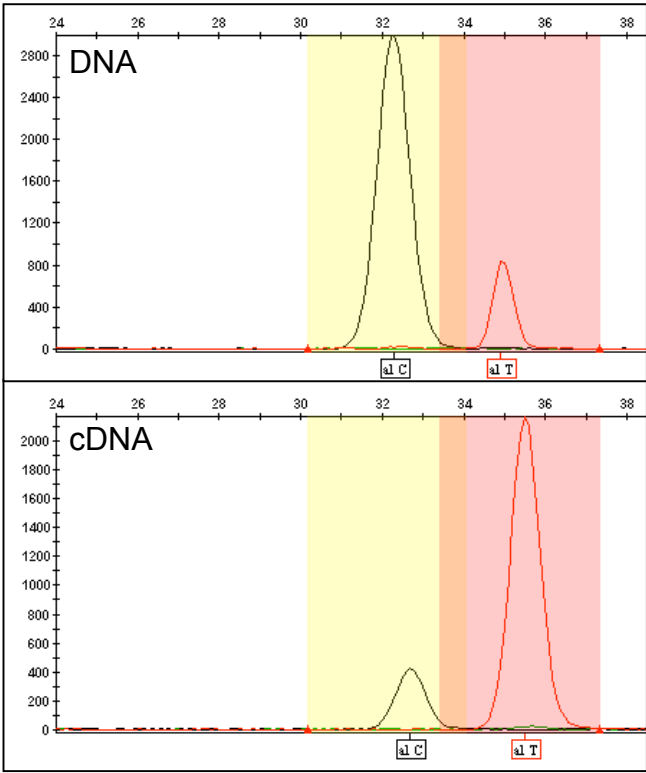

VM Tissue (6)

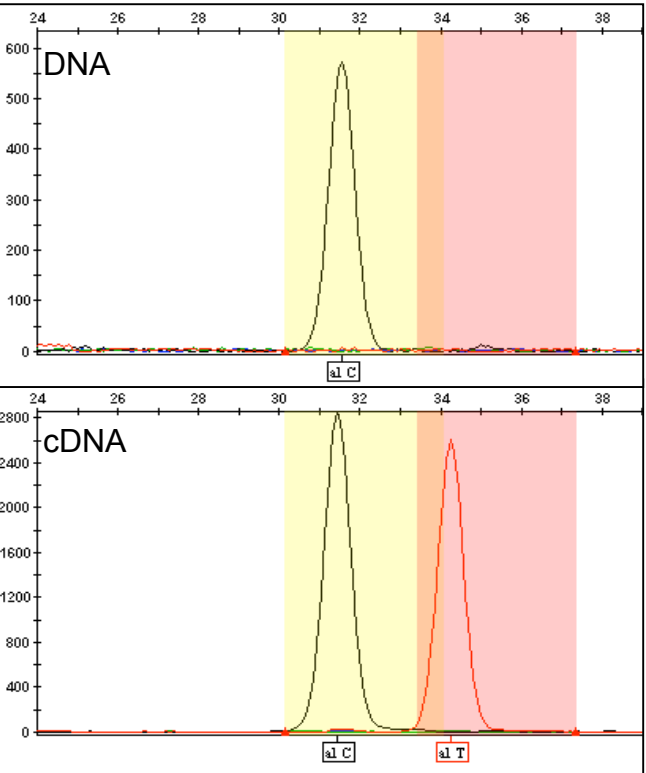

Supplementary Figure 3. SNaPshot data showing allele peaks for each TIE2 mutation

b. SNaPshot Assay, Y897H Reverse: a>g

Plasmid Controls:

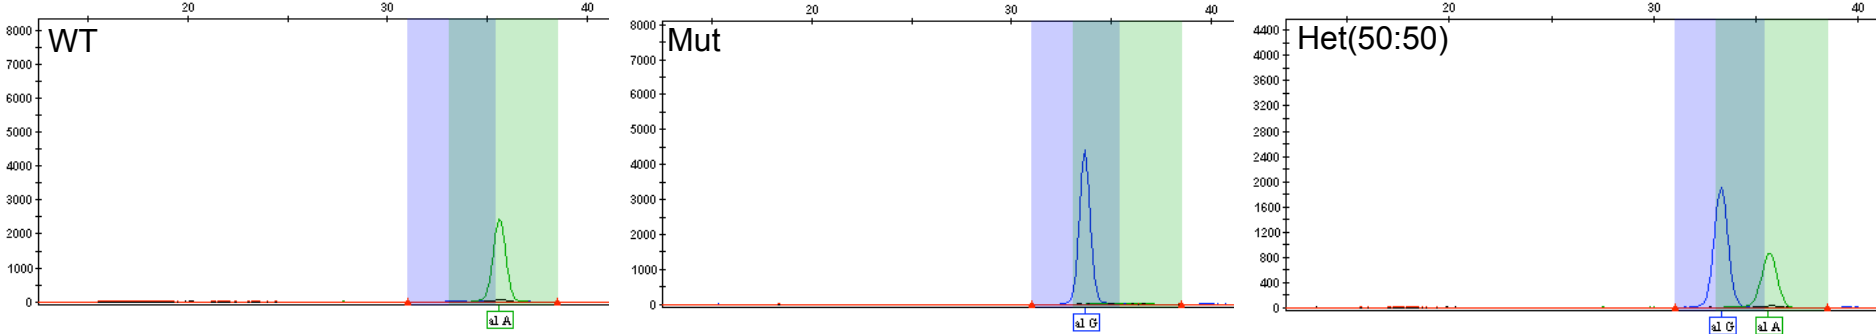

VM Tissue (25)

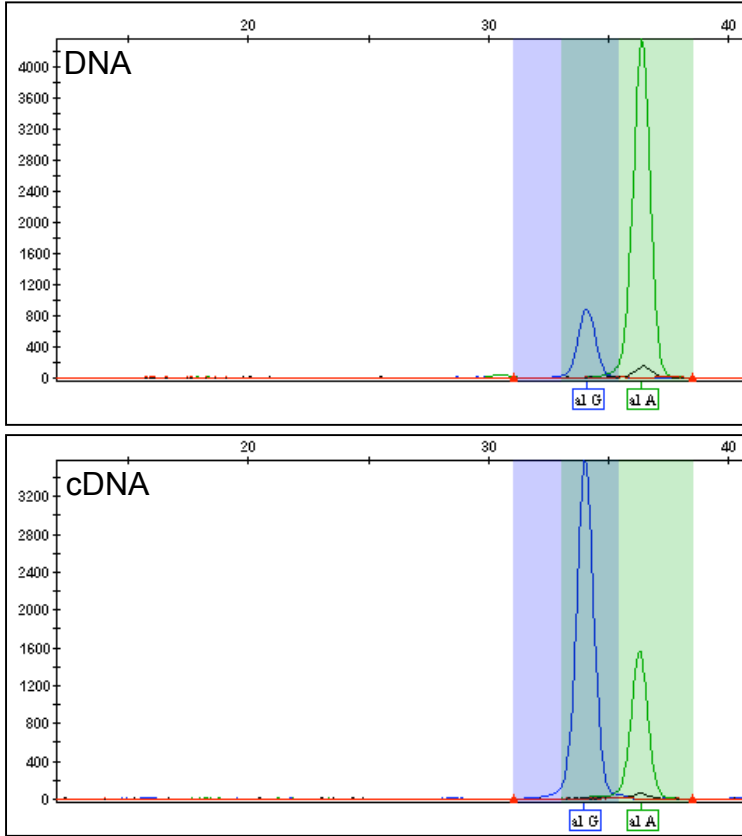

### Supplementary Figure 3. SNaPshot data showing allele peaks for each TIE2 mutation

#### c. SNaPshot Assay, Y897S Reverse: t>g

Plasmid Controls:

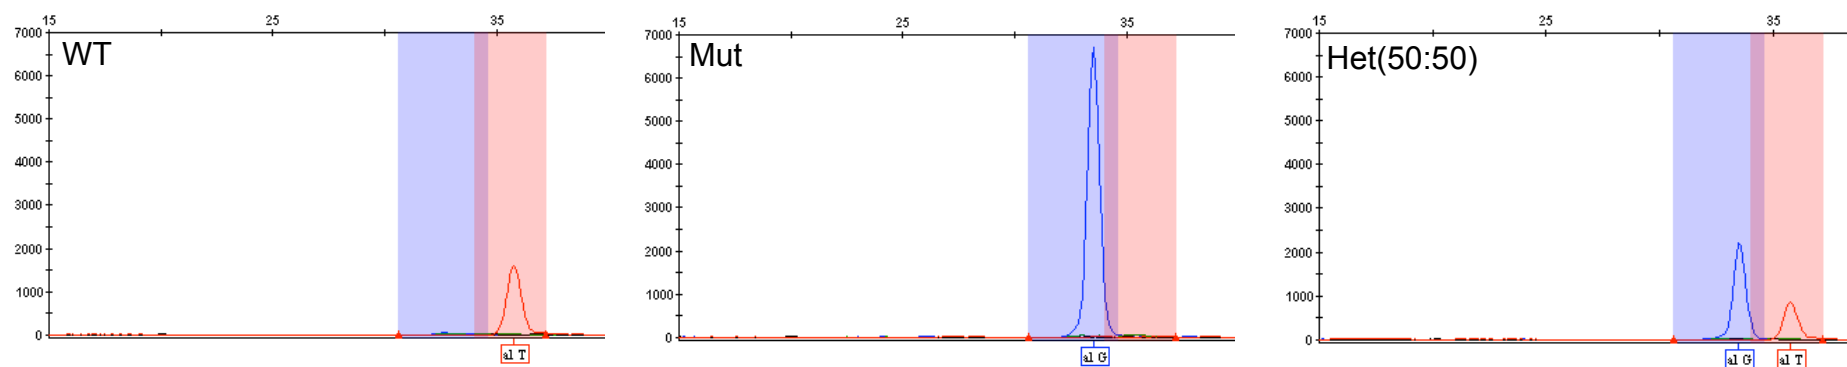

VM Tissue (26)

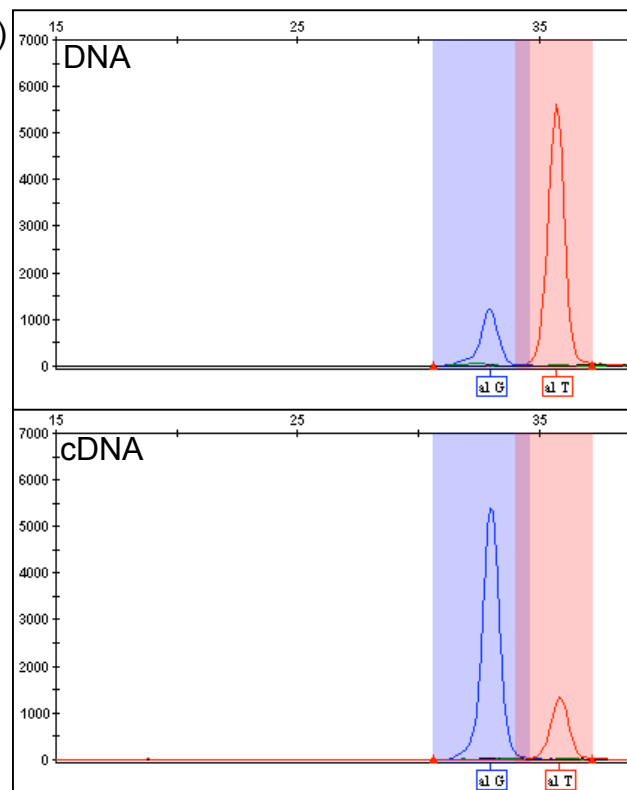

### Supplementary Figure 3. SNaPshot data showing allele peaks for each TIE2 mutation

#### d. SNaPshot Assay, Y897F Reverse: **t>a**

Plasmid Controls:

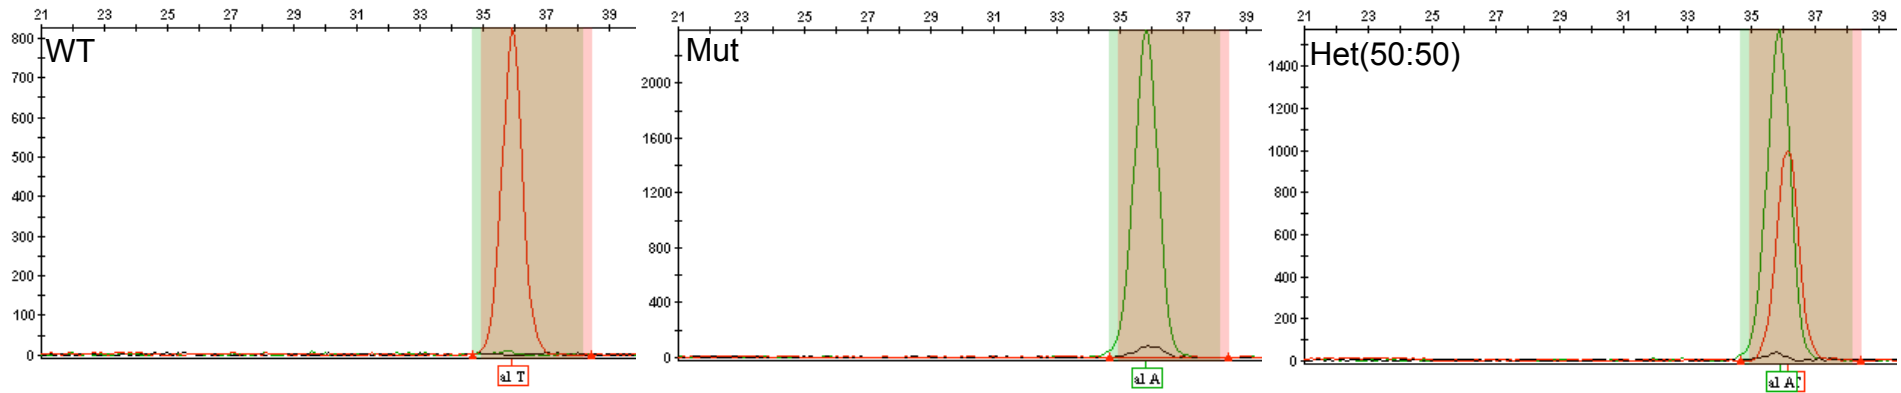

VM Tissue (27b)

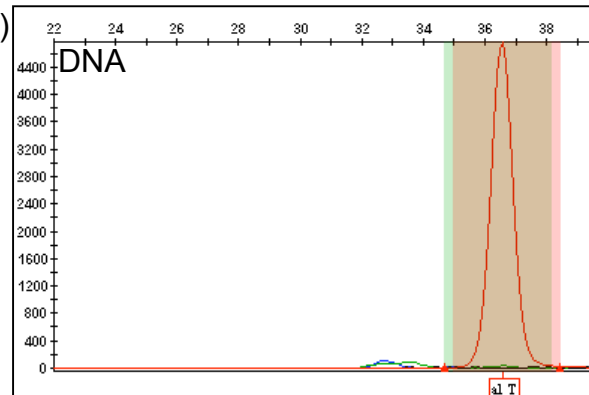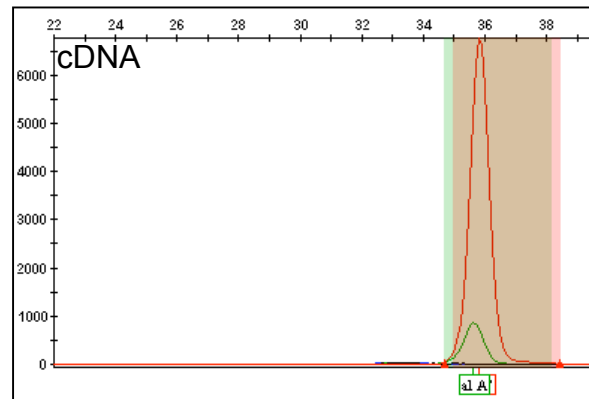

Supplementary Figure 3. SNaPshot data showing allele peaks for each TIE2 mutation

e. SNaPshot Assay, Y897C Reverse: t>c

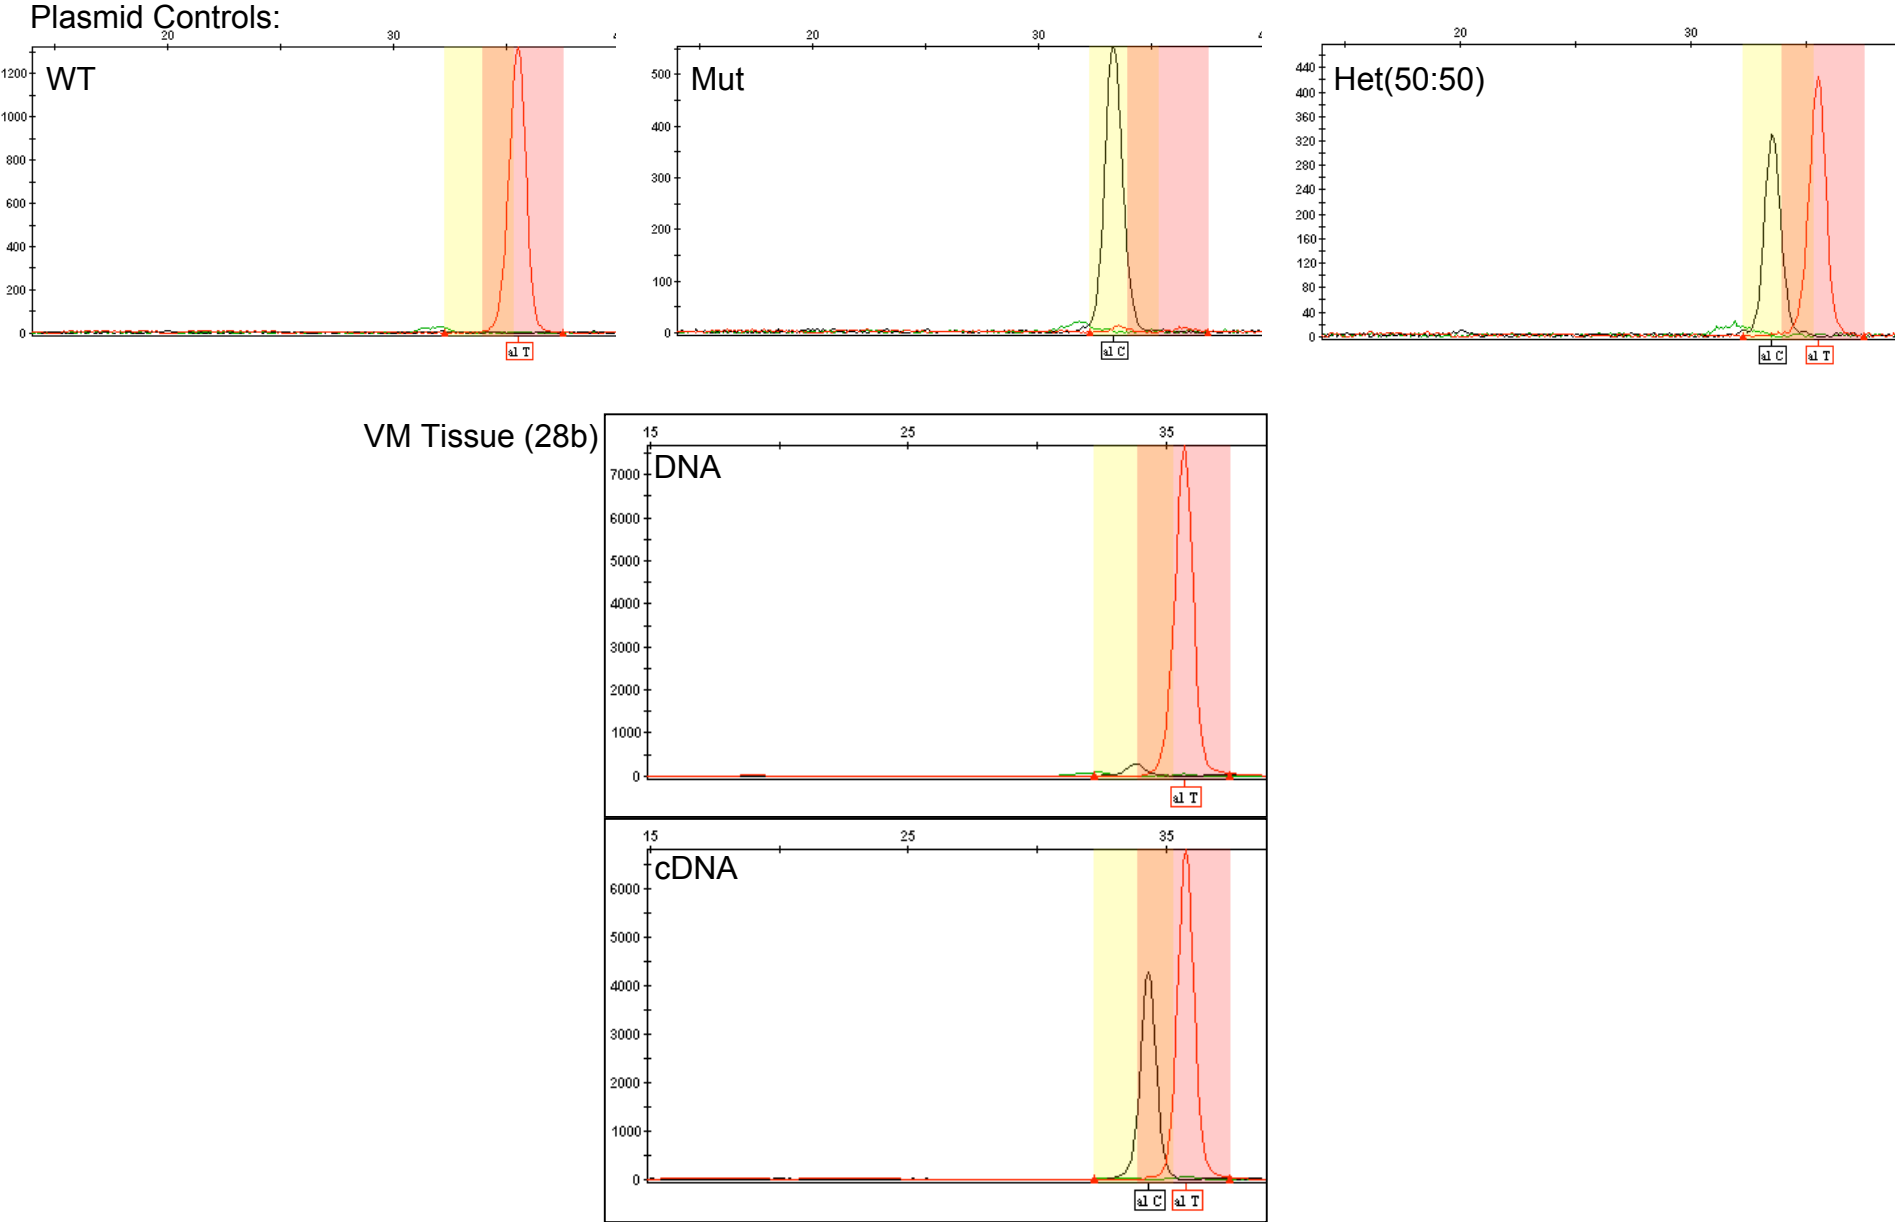

Supplementary Figure 3. SNaPshot data showing allele peaks for each TIE2 mutation

f. SNaPshot Assay, R915C Reverse: g>a

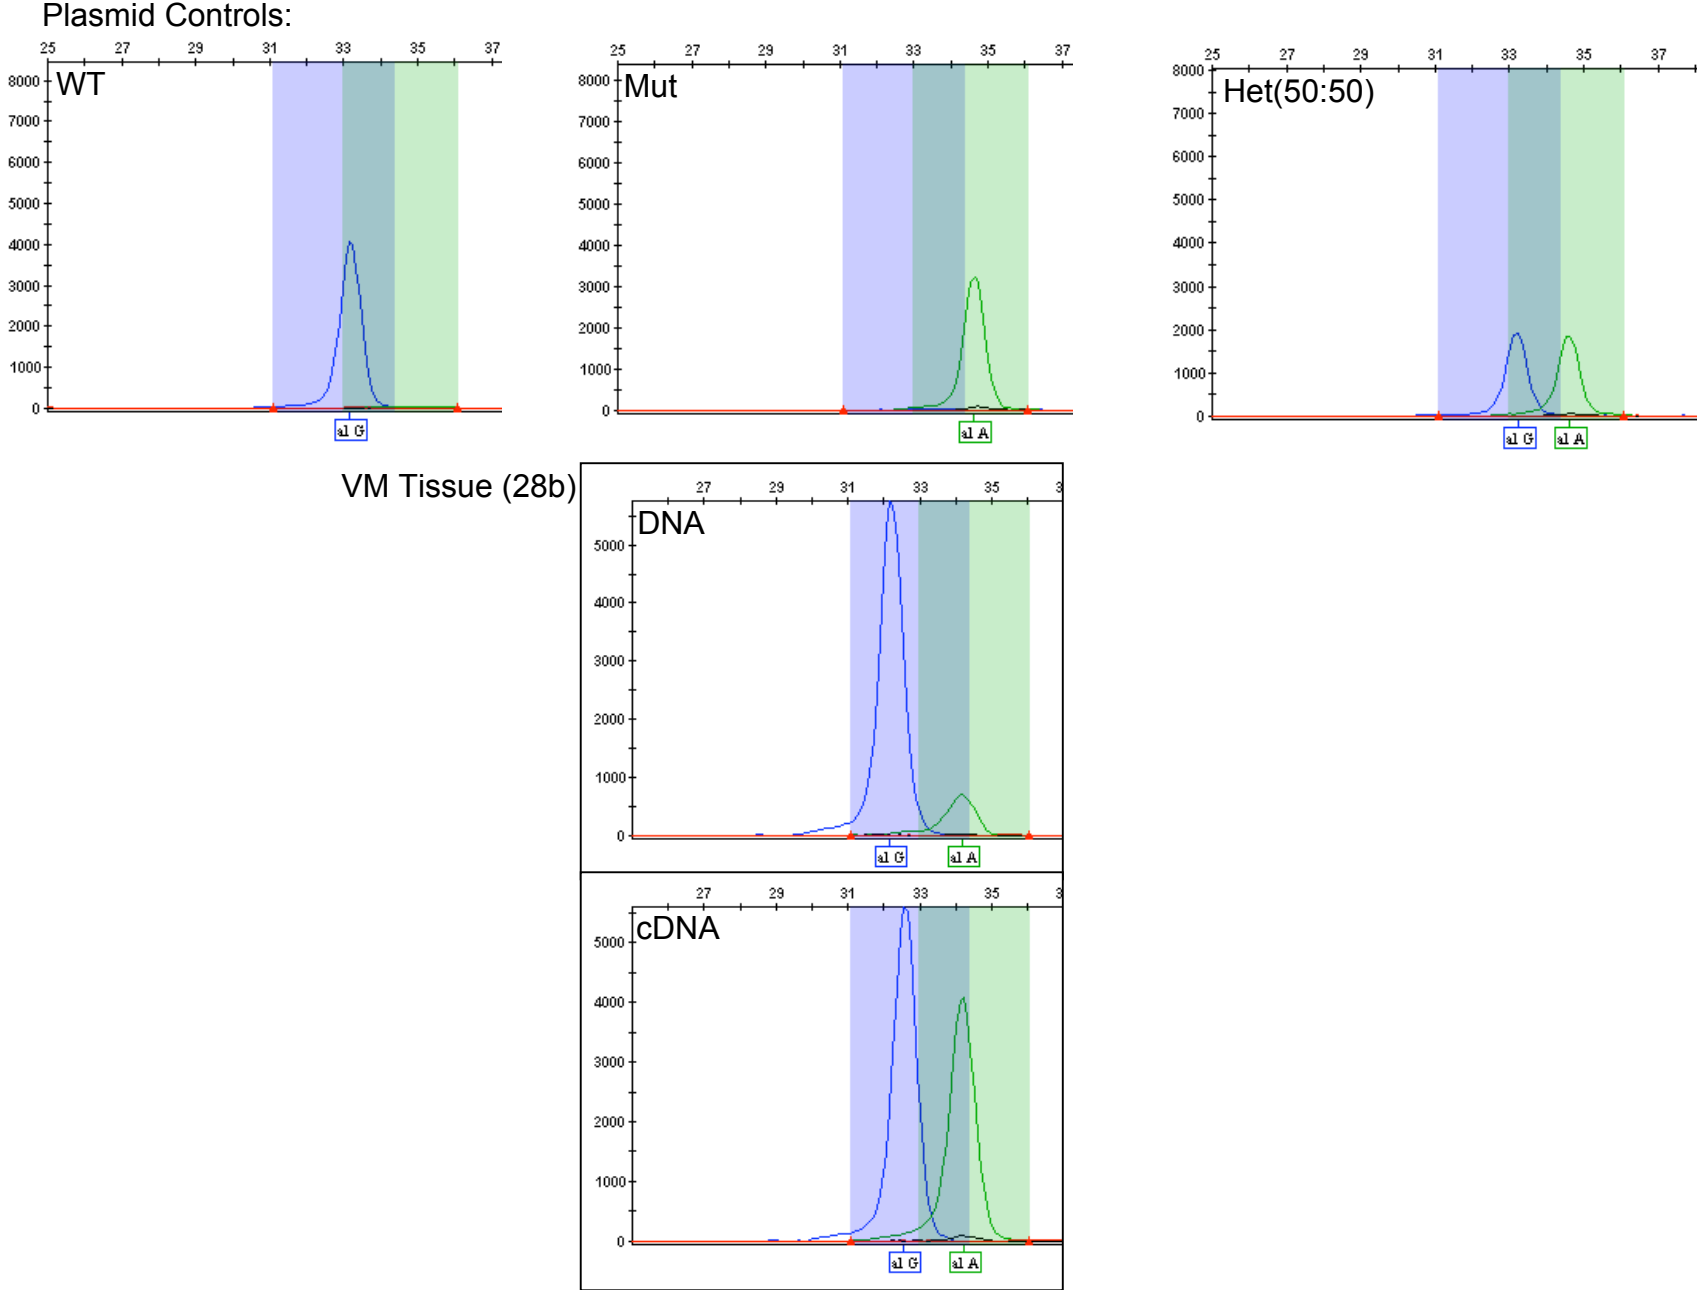

### Supplementary Figure 3. SNaPshot data showing allele peaks for each TIE2 mutation

#### g. SNaPshot Assay, R915L Reverse: c>a

Plasmid Controls:

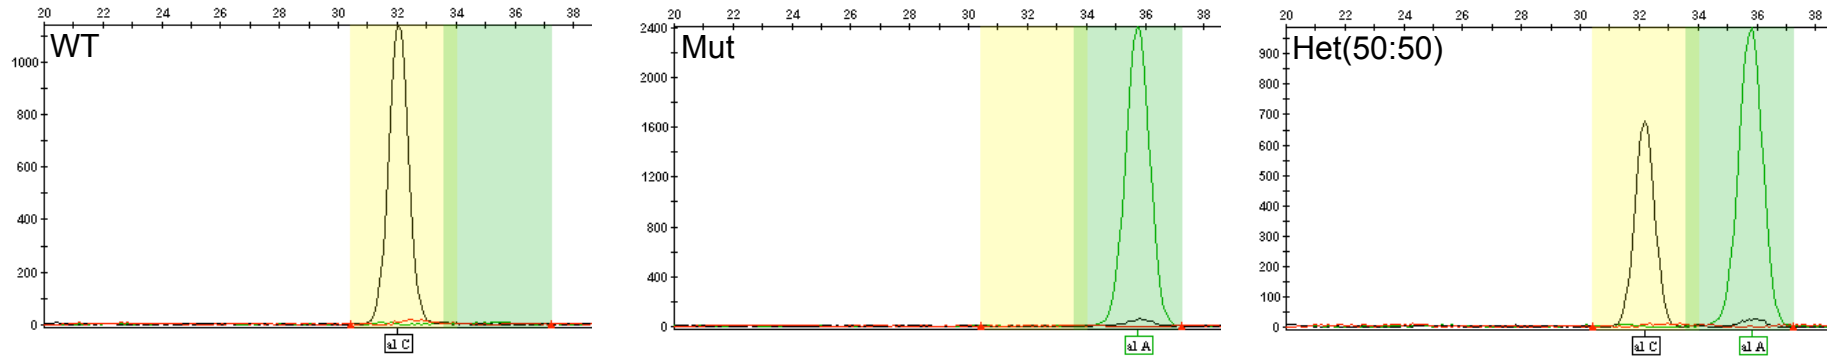

VM Tissue (27b)

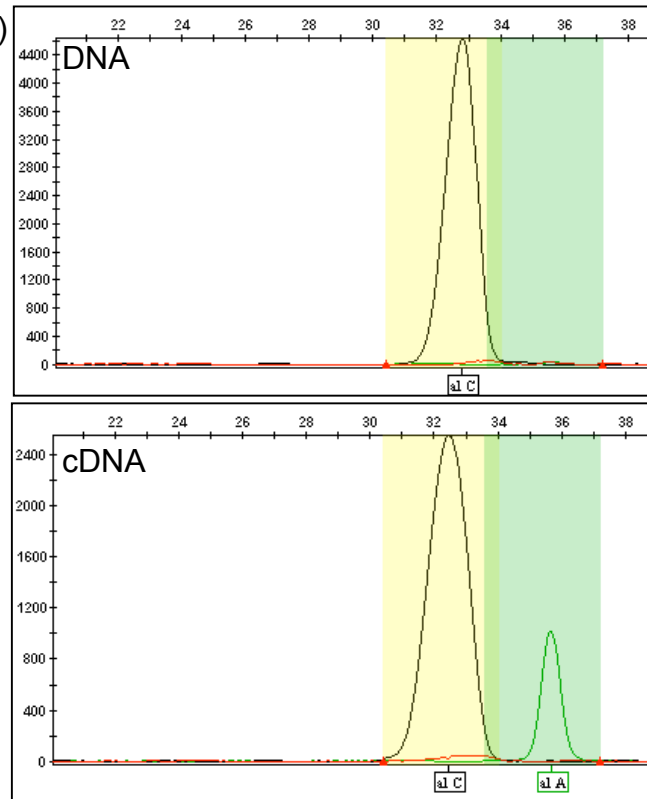



### Supplementary Figure 3. SNaPshot data showing allele peaks for each TIE2 mutation

#### h. SNaPshot Assay, S917I Forward: g>t

Plasmid Controls:

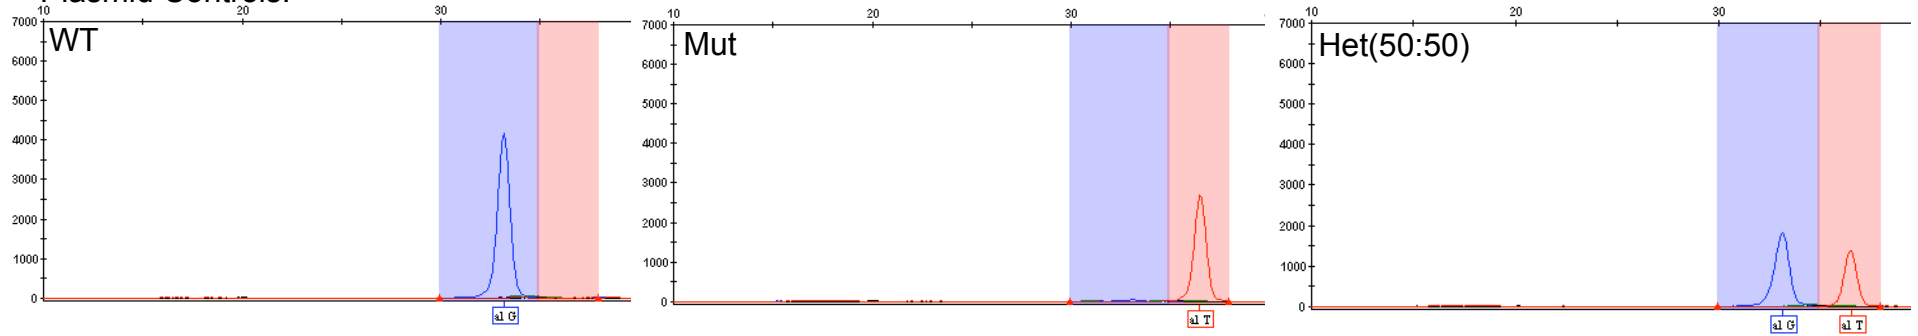

VM Tissue (26)

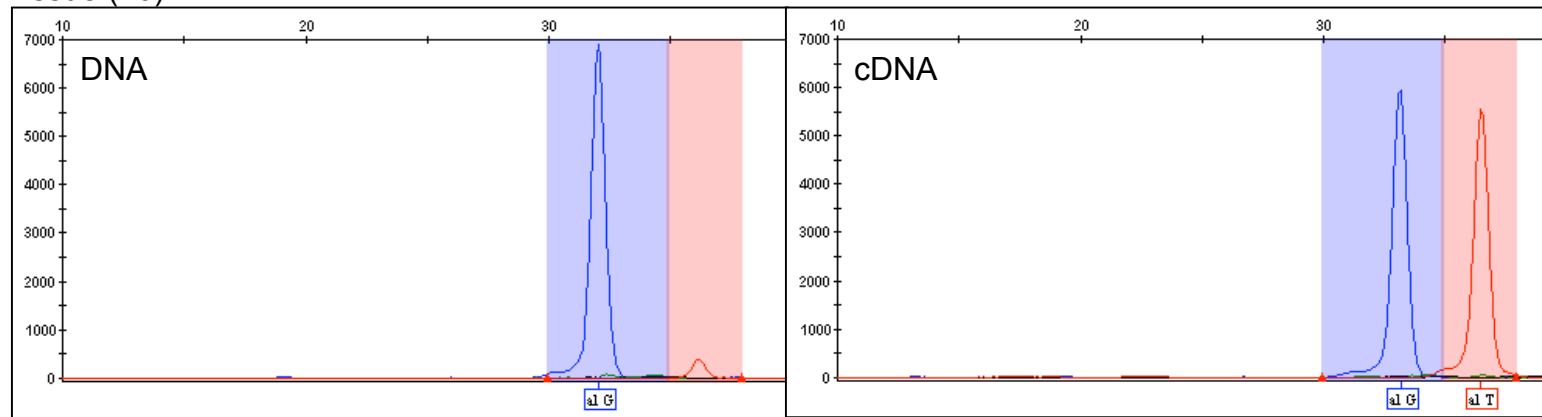

**Supplementary Figure 3. (a-h) SNaPshot data showing allele peaks for each TIE2 mutant.** Wild-type (WT) vs. mutant (Mut) plasmids, and 50:50 mixtures of these [Het] used as control templates (top panels). Data obtained from DNA and cDNA from tissue samples indicated (below). Peak colours correspond to nucleotide (allele); position of the peaks on x-axis (mobility) determined by size of single base extension-primers in combination with ddNTP added in extension reaction; relative peak-heights correlate with relative abundance of alleles detected in template (see corresponding raw peak heights obtained (**Supplementary Table 2 a-c**), and calculated relative level of mutant to wild-type alleles (**Supplementary Table 1**).

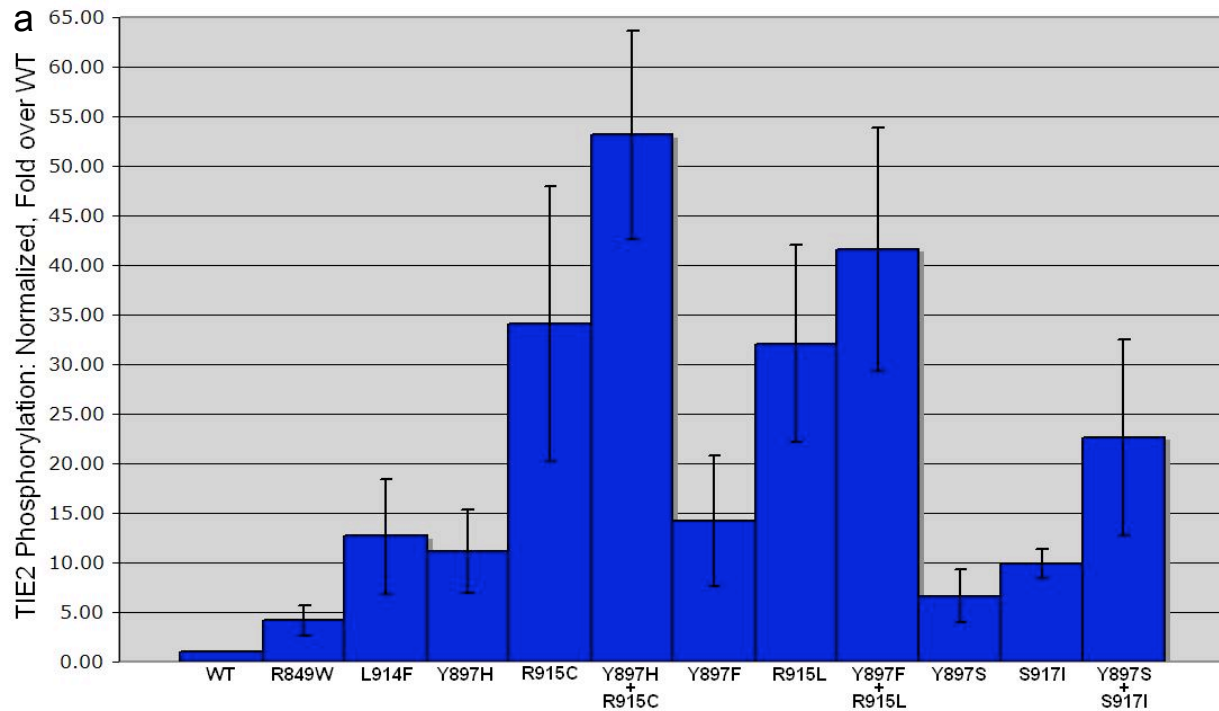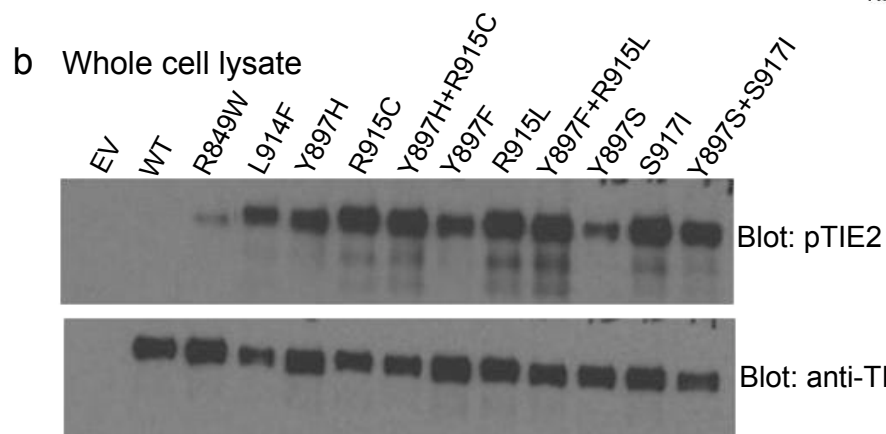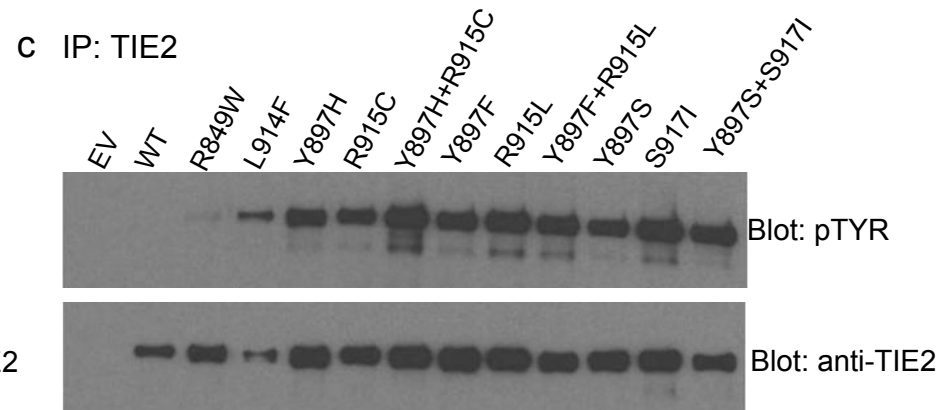

**Supplementary Figure 4. TIE2 somatic mutants are hyperphosphorylated.** (a) Graph of normalized phosphotyrosine signals (to total TIE2 when stripped and reprobated) obtained in Western blot on lysates from Cos-7 cells transfected with TIE2 mutants identified in sporadic VM. Intensities expressed as fold over wild-type (WT, set at 1) run on the same gel, across at least 3 experiments each. Common inherited VMCM mutation R849W, most frequent sporadic-mutant L914F, and three double-mutant versions of TIE2, along with constituent single mutants, assessed for relative effects on ligand-independent phosphorylation. (b) Confirmation of the identity of phosphorylated bands at 140kD as TIE2, by Western blots on total cell lysates from Cos-7 transfectants with anti-phosphoTIE2 (top panel) followed by strip-and-reprobe with anti-TIE2; and (c) Immunoprecipitation of lysates from Cos-7 transfectants with anti-TIE2, followed by Western blot with anti-phosphotyrosine, stripped and reprobated for TIE2.

# Supplementary Figure 5

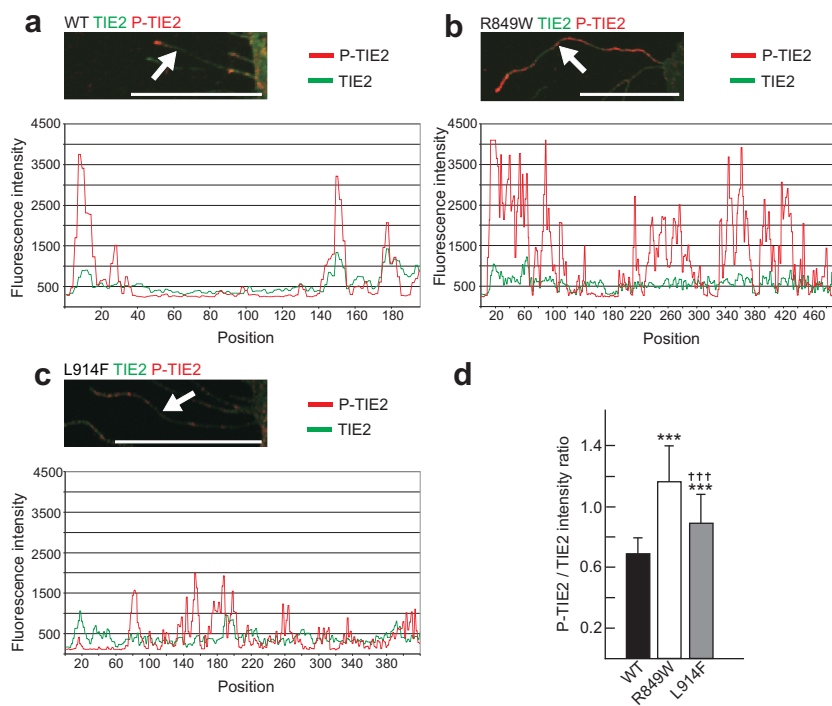

| Patient | Localization   | Size                | Lesions   |               |          |         | Sclerosed | Mutation             | Mut as % of Total |               | Fold enrichment<br>(cDNA/DNA) |
|---------|----------------|---------------------|-----------|---------------|----------|---------|-----------|----------------------|-------------------|---------------|-------------------------------|
|         |                |                     | cutaneous | sub-cutaneous | muscular | mucosal |           |                      | DNA               | cDNA          |                               |
| 1       | para-umbilical | extensive           | +         | +             | +        |         |           | <b>L914F</b>         | 27.54             | 52.62         | 1.91                          |
| 2       | genital        | extensive           | +         | +             |          |         |           | <b>L914F</b>         | -                 | -             | -                             |
| 3       | head           | extensive           | +         | +             |          |         | +         | <b>L914F</b>         | 4.66              | 66.68         | 14.31                         |
| 4       | cheek          | extensive           | +         | +             | +        | +       | +         | <b>L914F</b>         | 35.82             | 92.23         | 2.57                          |
| 5       | lip            | localized           | +         | +             | +        | +       |           | <b>L914F</b>         | 9.16              | 18.01         | 1.97                          |
| 6       | lip            | extensive           | +         | +             | +        | +       | +         | <b>L914F</b>         | ND                | 48.81         | ND to 48.81%                  |
| 7       | knee           | extensive           | +         | +             | +        |         |           | <b>L914F</b>         | 13.73             | 59.67         | 4.35                          |
| 8       | knee           | extensive           | +         | +             | +        |         |           | <b>L914F</b>         | -                 | -             | -                             |
| 9       | arm            | extensive           |           | +             | +        |         | +         | <b>L914F</b>         | -                 | -             | -                             |
| 10      | genital-knee   | extensive           |           | +             | +        |         | +         | <b>L914F</b>         | 48.32             | 88.20         | 1.83                          |
| 11      | knee           | extensive           | +         | +             | +        |         | +         | <b>L914F</b>         | -                 | -             | -                             |
| 12      | cubital nerve  | localized           | ?         | ?             | +        |         |           | <b>L914F</b>         | -                 | -             | -                             |
| 13      | arm            | extensive           |           | +             |          |         |           | <b>L914F</b>         | -                 | -             | -                             |
| 14      | thorax         | localized           |           | +             | +        |         | +         | <b>L914F</b>         | -                 | -             | -                             |
| 15      | lip            | localized           |           |               |          | +       | +         | <b>L914F</b>         | -                 | -             | -                             |
| 16      | subclavian     | localized           |           | +             |          |         |           | <b>L914F</b>         | -                 | -             | -                             |
| 17      | forehead       | localized           | +         | +             |          |         |           | <b>L914F</b>         | -                 | -             | -                             |
| 18      | lip            | localized           | +         | +             | +        |         | +         | <b>L914F</b>         | -                 | -             | -                             |
| 19      | cheek          | localized           |           | +             |          |         | +         | <b>L914F</b>         | -                 | -             | -                             |
| 20      | cheek          | extensive           |           | +             |          | +       | +         | <b>L914F</b>         | 5.72              | 60.95         | 10.66                         |
| 21      | knee           | extensive           | +         | +             | +        |         |           | <b>L914F</b>         | 19.66             | 70.59         | 3.59                          |
| 22      | knee           | extensive           | +         | +             | +        |         |           | <b>L914F</b>         | 18.47             | 57.98         | 3.14                          |
| 23      | ear            | localized           | +         | +             |          |         |           | <b>L914F</b>         | -                 | -             | -                             |
| 24      | forehead       | extensive           | +         |               |          |         |           | <b>L914F</b>         | -                 | 52.64         | N/A                           |
| 25      | buttock        | localized           | +         | +             |          |         |           | <b>Y897H + R915C</b> | 9.86 & 8.24       | 53.75 & 42.50 | 5.45 & 5.16                   |
| 26      | ear            | localized           | +         |               |          |         |           | <b>Y897S + S917I</b> | 8.21 & 6.64       | 61.87 & 54.30 | 7.54 & 8.18                   |
| 27 (a)  | buttock        | extensive, multiple | +         | +             | +        | +       |           | <b>Y897F + R915L</b> | 22.29 & 34.90     | -             | N/A                           |
| (b)     | foot           |                     |           |               |          |         |           | <b>Y897F + R915L</b> | ND & ND           | 7.59 & 18.54  | ND to 7.59, 18.54%            |
| 28 (a)  | wrist          | localized, multiple | +         | +             |          | +       |           | <b>Y897C + R915C</b> | -                 | -             | -                             |
| (b)     | tongue         |                     |           |               |          |         |           | <b>Y897C + R915C</b> | 4.55 & 10.79      | 48.69 & 44.72 | 10.7 & 4.14                   |

**Supplementary Table 1: VM patients with *TIE2* mutations.**

(a), (b): Multiple lesions from same patient.

Mutation-detection by dHPLC-screening followed by sequencing, confirmation by allele-specific PCR or restriction-site modification.

Estimates of mutant-allele(s) as % of total (DNA or cDNA) obtained using SNaPshot assay on a subset of tissue DNA and cDNA.

“-”: SNaPshot assay not performed; ND: Not detectable; N/A: Not applicable

Fold enrichment of mutant allele in cDNA as compared to DNA= (Mut as % of total cDNA / Mut as % of total DNA)

| Supplementary Table 2a.                  |          |               |                |                  |                   |                     |                  |       |                  |                |                 |  |
|------------------------------------------|----------|---------------|----------------|------------------|-------------------|---------------------|------------------|-------|------------------|----------------|-----------------|--|
| L914F                                    |          |               |                |                  |                   |                     |                  |       |                  |                |                 |  |
| L914F- Forward: CATGGAACCTTCTGGACTTC-C/T |          |               |                |                  |                   |                     |                  |       |                  |                |                 |  |
| Sample Name                              | Marker   | Allele 1 (WT) | Allele 2 (Mut) | Peak Height (WT) | Peak Height (Mut) | Mut/WT Allele Ratio | Normalized Ratio | Avg   | Mut (% of Total) | Peak Size (WT) | Peak Size (Mut) |  |
| 1-Ca                                     | L914F-CT | C             | T              | 4150             | 4395              | 1.059               | 1.29             | 1.11  | 52.62            | 31.42          | 34.14           |  |
| 1-Cb                                     | L914F-CT | C             | T              | 164              | 125               | 0.762               | 0.93             |       |                  | 31.46          | 34.15           |  |
| 1-Da                                     | L914F-CT | C             | T              | 272              | 84                | 0.309               | 0.38             | 0.38  | 27.54            | 31.58          | 34.35           |  |
| 3-Ca                                     | L914F-CT | C             | T              | 3296             | 5022              | 1.52                | 1.86             | 2.00  | 66.68            | 32.82          | 34.81           |  |
| 3-Cb                                     | L914F-CT | C             | T              | 2664             | 4685              | 1.76                | 2.14             |       |                  | 32.44          | 34.91           |  |
| 3-Da                                     | L914F-CT | C             | T              | 2590             | 96                | 0.04                | 0.05             | 0.05  | 4.66             | 32.24          | 35              |  |
| 3-Db                                     | L914F-CT | C             | T              | 2734             | 118               | 0.04                | 0.05             |       |                  | 32.11          | 35              |  |
| 4-Ca                                     | L914F-CT | C             | T              | 428              | 2170              | 5.07                | 6.18             | 11.88 | 92.23            | 32.69          | 35.49           |  |
| 4-Cb                                     | L914F-CT | C             | T              | 357              | 5144              | 14.41               | 17.57            |       |                  | 32.07          | 34.91           |  |
| 4-Da                                     | L914F-CT | C             | T              | 2993             | 835               | 0.28                | 0.34             | 0.56  | 35.82            | 32.3           | 34.91           |  |
| 4-Db                                     | L914F-CT | C             | T              | 1985             | 1263              | 0.64                | 0.78             |       |                  | 31.93          | 35              |  |
| 5-Ca                                     | L914F-CT | C             | T              | 3733             | 690               | 0.185               | 0.23             | 0.22  | 18.01            | 31.36          | 34.22           |  |
| 5-Cb                                     | L914F-CT | C             | T              | 245              | 43                | 0.176               | 0.21             |       |                  | 31.37          | 34.15           |  |
| 5-Da                                     | L914F-CT | C             | T              | 310              | 28                | 0.090               | 0.11             | 0.10  | 9.16             | 31.5           | 34.26           |  |
| 5-Db                                     | L914F-CT | C             | T              | 506              | 38                | 0.075               | 0.09             |       |                  | 31.58          | 34.25           |  |
| 6-Ca                                     | L914F-CT | C             | T              | 2859             | 2604              | 0.911               | 1.11             | 0.95  | 48.81            | 31.42          | 34.24           |  |
| 6-Cb                                     | L914F-CT | C             | T              | 167              | 109               | 0.653               | 0.80             |       |                  | 31.37          | 34.15           |  |
| 6-Da                                     | L914F-CT | C             | -              | 413              | -                 | 0.000               | 0.00             | 0.00  | 0.00             | 31.5           | -               |  |
| 6-Db                                     | L914F-CT | C             | -              | 573              | -                 | 0.000               | 0.00             |       |                  | 31.56          | -               |  |
| 7-Ca                                     | L914F-CT | C             | T              | 3114             | 4335              | 1.392               | 1.70             | 1.48  | 59.67            | 31.46          | 34.22           |  |
| 7-Cb                                     | L914F-CT | C             | T              | 145              | 150               | 1.034               | 1.26             |       |                  | 31.42          | 34.14           |  |
| 7-Da                                     | L914F-CT | C             | T              | 407              | 49                | 0.120               | 0.15             | 0.16  | 13.73            | 31.45          | 34.26           |  |
| 7-Db                                     | L914F-CT | C             | T              | 427              | 60                | 0.141               | 0.17             |       |                  | 31.44          | 34.17           |  |
| 10-Ca                                    | L914F-CT | C             | T              | 713              | 3402              | 4.77                | 5.82             | 7.47  | 88.20            | 32.59          | 35.49           |  |
| 10-Cb                                    | L914F-CT | C             | T              | 228              | 1706              | 7.48                | 9.12             |       |                  | 32.75          | 34.73           |  |
| 10-Da                                    | L914F-CT | C             | T              | 1358             | 1070              | 0.79                | 0.96             | 0.94  | 48.32            | 32.19          | 35              |  |
| 10-Db                                    | L914F-CT | C             | T              | 2630             | 1961              | 0.75                | 0.91             |       |                  | 32.41          | 35              |  |
| 20-Ca                                    | L914F-CT | C             | T              | 3496             | 4914              | 1.406               | 1.71             | 1.56  | 60.95            | 31.54          | 34.34           |  |
| 20-Cb                                    | L914F-CT | C             | T              | 123              | 142               | 1.154               | 1.41             |       |                  | 31.46          | 34.23           |  |
| 20-Da                                    | L914F-CT | C             | T              | 314              | 14                | 0.045               | 0.05             | 0.06  | 5.72             | 31.56          | 34.25           |  |
| 20-Db                                    | L914F-CT | C             | T              | 456              | 25                | 0.055               | 0.07             |       |                  | 31.61          | 34.45           |  |
| 21-Ca                                    | L914F-CT | C             | T              | 2233             | 4035              | 1.81                | 2.20             | 2.40  | 70.59            | 32.7           | 34.81           |  |
| 21-Cb                                    | L914F-CT | C             | T              | 2031             | 4325              | 2.13                | 2.60             |       |                  | 32.98          | 34.73           |  |
| 21-Da                                    | L914F-CT | C             | T              | 2396             | 547               | 0.23                | 0.28             | 0.24  | 19.66            | 32.15          | 35              |  |
| 21-Db                                    | L914F-CT | C             | T              | 2826             | 489               | 0.17                | 0.21             |       |                  | 32.44          | 35              |  |
| 22-Ca                                    | L914F-CT | C             | T              | 3307             | 4307              | 1.302               | 1.59             | 1.38  | 57.98            | 31.46          | 34.22           |  |
| 22-Cb                                    | L914F-CT | C             | T              | 151              | 145               | 0.960               | 1.17             |       |                  | 31.37          | 34.15           |  |
| 22-Da                                    | L914F-CT | C             | T              | 406              | 76                | 0.187               | 0.23             | 0.23  | 18.47            | 31.48          | 34.27           |  |
| 22-Db                                    | L914F-CT | C             | T              | 472              | 87                | 0.184               | 0.22             |       |                  | 31.68          | 34.44           |  |
| 24-Ca                                    | L914F-CT | C             | T              | 782              | 709               | 0.91                | 1.11             | 1.11  | 52.64            | 31.31          | 34.35           |  |
| 24-Cb                                    | L914F-CT | C             | T              | 1229             | 1126              | 0.92                | 1.12             |       |                  | 31.58          | 34.44           |  |
| Het-1                                    | L914F-CT | C             | T              | 237              | 225               | 0.95                | Avg when 50:50=  |       |                  | 31.86          | 34.7            |  |
| Het-2                                    | L914F-CT | C             | T              | 578              | 402               | 0.70                | 0.82             |       |                  | 31.43          | 34.43           |  |
| Mut-1                                    | L914F-CT | -             | T              | -                | 819               |                     |                  |       |                  |                | 34.8            |  |
| Mut-2                                    | L914F-CT | -             | T              | -                | 780               |                     |                  |       |                  |                | 34.26           |  |
| WT-1                                     | L914F-CT | C             | -              | 459              | -                 |                     |                  |       |                  | 31.98          |                 |  |
| WT-2                                     | L914F-CT | C             | -              | 1435             | -                 |                     |                  |       |                  | 31.15          |                 |  |

**Supplementary Table 2:** SNaPshot data showing peak sizes (positions on the x-axis: mobility) and heights of wild-type (WT; black) and mutant (Mut; red) alleles.  
Ca: cDNA amplicon 1; Cb: cDNA amplicon 2; Da: DNA amplicon 1, Db: DNA amplicon 2  
Yellow highlight: Plasmid-DNA Ctrl's for: wild-type (WT), Mutant (Mut), and 50:50 ratio of wild-type:mutant alleles (Het-1 and 2)  
Mut/WT Allele Ratio= Peak height (Mut)/ Peak height (WT); Normalized Ratio= [(Mut/WT allele Ratio)/(Avg when 50:50)]; where Avg when 50:50= [Avg (Mut/WT Allele Ratio) from Het-1 & Het-2]  
Mutant (% of Total) = [Normalized Mut/Wt ratio X (100/(Normalized mut/wt ratio+1))]

| Supplementary Table 2b.                        |          |               |                |                  |                   |                     |                       |       |                  |                |                 |
|------------------------------------------------|----------|---------------|----------------|------------------|-------------------|---------------------|-----------------------|-------|------------------|----------------|-----------------|
| Y897H                                          |          |               |                |                  |                   |                     |                       |       |                  |                |                 |
| Y897H-Reverse: GTACTCAATGGCCAGGTACAAG-T/A      |          |               |                |                  |                   |                     |                       |       |                  |                |                 |
| Sample Name                                    | Marker   | Allele 1 (WT) | Allele 2 (Mut) | Peak Height (WT) | Peak Height (Mut) | Mut/WT Allele Ratio | Normalized Ratio      | Avg   | Mut (% of Total) | Peak Size (WT) | Peak Size (Mut) |
| 25-Ca                                          | Y897H-AG | A             | G              | 1555             | 3583              | 2.304               | 1.213                 | 1.162 | 53.75            | 36.37          | 33.99           |
| 25-Cb                                          | Y897H-AG | A             | G              | 1726             | 3646              | 2.112               | 1.112                 |       |                  | 35.49          | 33.61           |
| 25-Da                                          | Y897H-AG | A             | G              | 4353             | 883               | 0.203               | 0.107                 | 0.109 | 9.86             | 36.38          | 34.1            |
| 25-Db                                          | Y897H-AG | A             | G              | 4399             | 937               | 0.213               | 0.112                 |       |                  | 36.27          | 34.03           |
| Het-1                                          | Y897H-AG | A             | G              | 2644             | 5918              | 2.24                | Avg when 50:50= 1.90  |       |                  | 35.59          | 33.77           |
| Het-2                                          | Y897H-AG | A             | G              | 1280             | 1990              | 1.55                | 1.90                  |       |                  | 35.58          | 33.68           |
| Mut                                            | Y897H-AG | -             | G              | -                | 4434              |                     |                       |       |                  | -              | 33.69           |
| WT                                             | Y897H-AG | A             | -              | 2456             | -                 |                     |                       |       |                  | 35.59          | -               |
| Y897S                                          |          |               |                |                  |                   |                     |                       |       |                  |                |                 |
| Y897C/F/S-Reverse: CGTACTCAATGGCCAGGTACAAG-T/G |          |               |                |                  |                   |                     |                       |       |                  |                |                 |
| Sample Name                                    | Marker   | Allele 1 (WT) | Allele 2 (Mut) | Peak Height (WT) | Peak Height (Mut) | Mut/WT Allele Ratio | Normalized Ratio      | Avg   | Mut (% of Total) | Peak Size (WT) | Peak Size (Mut) |
| 26-Ca                                          | Y897S-TG | T             | G              | 1342             | 5390              | 4.016               | 1.575                 | 1.622 | 61.87            | 35.81          | 32.97           |
| 26-Cb                                          | Y897S-TG | T             | G              | 843              | 3589              | 4.257               | 1.670                 |       |                  | 35.71          | 32.92           |
| 26-Da                                          | Y897S-TG | T             | G              | 5608             | 1230              | 0.219               | 0.086                 | 0.089 | 8.21             | 35.71          | 32.99           |
| 26-Db                                          | Y897S-TG | T             | G              | 6294             | 1489              | 0.237               | 0.093                 |       |                  | 35.71          | 32.89           |
| Het-1                                          | Y897S-TG | T             | G              | 2046             | 5236              | 2.56                | Avg when 50:50= 2.55  |       |                  | 35.69          | 33.48           |
| Het-2                                          | Y897S-TG | T             | G              | 862              | 2197              | 2.55                | 2.55                  |       |                  | 35.78          | 33.49           |
| Mut                                            | Y897S-TG | -             | G              | -                | 6705              |                     |                       |       |                  | -              | 33.53           |
| WT                                             | Y897S-TG | T             | -              | 1592             | -                 |                     |                       |       |                  | 35.78          | -               |
| Y897F                                          |          |               |                |                  |                   |                     |                       |       |                  |                |                 |
| Y897C/F/S-Reverse: CGTACTCAATGGCCAGGTACAAG-T/A |          |               |                |                  |                   |                     |                       |       |                  |                |                 |
| Sample Name                                    | Marker   | Allele 1 (WT) | Allele 2 (Mut) | Peak Height (WT) | Peak Height (Mut) | Mut/WT Allele Ratio | Normalized Ratio      | Avg   | Mut (% of Total) | Peak Size (WT) | Peak Size (Mut) |
| 27(a)-Db                                       | Y897F-TA | T             | A              | 4396             | 2033              | 0.462               | 0.300                 | 0.287 | 22.29            | 36.56          | 36.56           |
| 27(a)-Da                                       | Y897F-TA | T             | A              | 7027             | 2958              | 0.421               | 0.273                 |       |                  | 36             | 35.9            |
| 27(b)-Ca                                       | Y897F-TA | T             | A              | 6775             | 871               | 0.129               | 0.083                 | 0.082 | 7.59             | 35.8           | 35.6            |
| 27(b)-Cb                                       | Y897F-TA | T             | A              | 5217             | 649               | 0.124               | 0.081                 |       |                  | 35.8           | 35.6            |
| 27(b)-Da                                       | Y897F-TA | T             | -              | 6722             | -                 | 0.000               | 0.000                 | 0.000 | 0.00             | 36.2           | -               |
| 27(b)-Db                                       | Y897F-TA | T             | -              | 4772             | -                 | 0.000               | 0.000                 |       |                  | 36.57          | -               |
| Het-1                                          | Y897F-TA | T             | A              | 763              | 1147              | 1.50                | Avg when 50:50= 1.54  |       |                  | 36             | 35.8            |
| Het-2                                          | Y897F-TA | T             | A              | 997              | 1575              | 1.58                | 1.54                  |       |                  | 36.14          | 35.93           |
| Mut-1                                          | Y897F-TA | -             | A              | -                | 2513              |                     |                       |       |                  | -              | 35.9            |
| Mut-2                                          | Y897F-TA | -             | A              | -                | 2389              |                     |                       |       |                  | -              | 35.82           |
| WT-1                                           | Y897F-TA | T             | -              | 826              | -                 |                     |                       |       |                  | 35.91          | -               |
| WT-2                                           | Y897F-TA | T             | -              | 1081             | -                 |                     |                       |       |                  | 36.09          | -               |
| Y897C                                          |          |               |                |                  |                   |                     |                       |       |                  |                |                 |
| Y897C/F/S-Reverse: CGTACTCAATGGCCAGGTACAAG-T/C |          |               |                |                  |                   |                     |                       |       |                  |                |                 |
| Sample Name                                    | Marker   | Allele 1 (WT) | Allele 2 (Mut) | Peak Height (WT) | Peak Height (Mut) | Mut/WT Allele Ratio | Normalized Ratio      | Avg   | Mut (% of Total) | Peak Size (WT) | Peak Size (Mut) |
| 28(b)-Ca                                       | Y897C-TC | T             | C              | 6797             | 4284              | 0.630               | 0.810                 | 0.949 | 48.69            | 35.79          | 34.33           |
| 28(b)-Cb                                       | Y897C-TC | T             | C              | 1488             | 1259              | 0.846               | 1.088                 |       |                  | 35.78          | 34.33           |
| 28(b)-Da                                       | Y897C-TC | T             | C              | 6995             | 271               | 0.039               | 0.050                 | 0.048 | 4.55             | 35.92          | 34.04           |
| 28(b)-Db                                       | Y897C-TC | T             | C              | 7677             | 272               | 0.035               | 0.046                 |       |                  | 35.71          | 33.87           |
| Het-1                                          | Y897C-TC | T             | C              | 425              | 330               | 0.776               | Avg when 50:50= 0.778 |       |                  | 35.5           | 33.5            |
| Het-2                                          | Y897C-TC | T             | C              | 440              | 343               | 0.780               | 0.778                 |       |                  | 35.5           | 33.53           |
| Mut                                            | Y897C-TC | -             | C              | -                | 554               |                     |                       |       |                  | -              | 33.28           |
| WT                                             | Y897C-TC | T             | -              | 1324             | -                 |                     |                       |       |                  | 35.5           | -               |

**Supplementary Table 2:** SNaPshot data showing peak sizes (positions on the x-axis: mobility) and heights of wild-type (WT; black) and mutant (Mut; red) alleles.  
Ca: cDNA amplicon 1; Cb: cDNA amplicon 2; Da: DNA amplicon 1, Db: DNA amplicon 2  
Yellow highlight: Plasmid-DNA Ctrls for: wild-type (WT), Mutant (Mut), and 50:50 ratio of wild-type:mutant alleles (Het-1 and 2)  
Mut/WT Allele Ratio= Peak height (Mut)/ Peak height (WT); Normalized Ratio= [(Mut/WT allele Ratio)/(Avg when 50:50)]; where Avg when 50:50= [Avg (Mut/WT Allele Ratio) from Het-1 & Het-2]  
Mutant (% of Total) = [Normalized Mut/WT ratio X (100/(Normalized mut/wt ratio+1))]

| Supplementary Table 2c.                                                                                                                                                                    |          |                  |                   |                     |                      |                     |                  |       |                  |                   |                    |
|--------------------------------------------------------------------------------------------------------------------------------------------------------------------------------------------|----------|------------------|-------------------|---------------------|----------------------|---------------------|------------------|-------|------------------|-------------------|--------------------|
| R915C                                                                                                                                                                                      |          |                  |                   |                     |                      |                     |                  |       |                  |                   |                    |
| R915C-Reverse: TCCGCTCCAGCACACGGCTCTTGC-G/A                                                                                                                                                |          |                  |                   |                     |                      |                     |                  |       |                  |                   |                    |
| Sample Name                                                                                                                                                                                | Marker   | Allele 1<br>(WT) | Allele 2<br>(Mut) | Peak Height<br>(WT) | Peak Height<br>(Mut) | Mut/WT Allele Ratio | Normalized Ratio | Avg   | Mut (% of Total) | Peak Size<br>(WT) | Peak Size<br>(Mut) |
| 25-Ca                                                                                                                                                                                      | R915C-GA | G                | A                 | 4382                | 3145                 | 0.718               | 0.704            | 0.739 | 42.50            | 32.67             | 34.23              |
| 25-Cb                                                                                                                                                                                      | R915C-GA | G                | A                 | 4030                | 3184                 | 0.790               | 0.775            |       |                  | 33.29             | 34.62              |
| 25-Da                                                                                                                                                                                      | R915C-GA | G                | A                 | 6874                | 676                  | 0.098               | 0.096            | 0.090 | 8.24             | 32.46             | 34.24              |
| 25-Db                                                                                                                                                                                      | R915C-GA | G                | A                 | 5866                | 498                  | 0.085               | 0.083            |       |                  | 32.39             | 34.08              |
| 28(b)-Ca                                                                                                                                                                                   | R915C-GA | G                | A                 | 5599                | 4092                 | 0.731               | 0.717            | 0.809 | 44.72            | 32.56             | 34.22              |
| 28(b)-Cb                                                                                                                                                                                   | R915C-GA | G                | A                 | 4588                | 4217                 | 0.919               | 0.901            |       |                  | 33.27             | 34.62              |
| 28(b)-Db                                                                                                                                                                                   | R915C-GA | G                | A                 | 5757                | 708                  | 0.123               | 0.121            | 0.121 | 10.79            | 32.17             | 34.19              |
| Het-1                                                                                                                                                                                      | R915C-GA | G                | A                 | 4474                | 4831                 | 1.08                | Avg when 50:50=  |       |                  | 33.32             | 34.63              |
| Het-2                                                                                                                                                                                      | R915C-GA | G                | A                 | 1920                | 1854                 | 0.97                | 1.02             |       |                  | 33.22             | 34.63              |
| Mut                                                                                                                                                                                        | R915C-GA | -                | A                 | -                   | 3243                 |                     |                  |       |                  | -                 | 34.63              |
| WT                                                                                                                                                                                         | R915C-GA | G                | -                 | 4069                | -                    |                     |                  |       |                  | 33.16             | -                  |
| R915L                                                                                                                                                                                      |          |                  |                   |                     |                      |                     |                  |       |                  |                   |                    |
| R915L-Reverse: GTCTCCAGCACACGGCTCTTG-C/A                                                                                                                                                   |          |                  |                   |                     |                      |                     |                  |       |                  |                   |                    |
| Sample Name                                                                                                                                                                                | Marker   | Allele 1<br>(WT) | Allele 2<br>(Mut) | Peak Height<br>(WT) | Peak Height<br>(Mut) | Mut/WT Allele Ratio | Normalized Ratio | Avg   | Mut (% of Total) | Peak Size<br>(WT) | Peak Size<br>(Mut) |
| 27(a)-Da                                                                                                                                                                                   | R915L-CA | C                | A                 | 2255                | 1923                 | 0.853               | 0.572            | 0.536 | 34.90            | 32.34             | 35.6               |
| 27(a)-Db                                                                                                                                                                                   | R915L-CA | C                | A                 | 5073                | 3777                 | 0.745               | 0.500            |       |                  | 32.93             | 35.7               |
| 27(b)-Ca                                                                                                                                                                                   | R915L-CA | C                | A                 | 2885                | 808                  | 0.280               | 0.188            | 0.228 | 18.54            | 32.5              | 35.7               |
| 27(b)-Cb                                                                                                                                                                                   | R915L-CA | C                | A                 | 2549                | 1015                 | 0.398               | 0.267            |       |                  | 32.46             | 35.71              |
| 27(b)-Da                                                                                                                                                                                   | R915L-CA | C                | -                 | 2478                | -                    | 0.000               | 0.000            | 0.000 | 0.00             | 32.63             | -                  |
| 27(b)-Db                                                                                                                                                                                   | R915L-CA | C                | -                 | 4637                | -                    | 0.000               | 0.000            |       |                  | 32.8              | -                  |
| Het-1                                                                                                                                                                                      | R915L-CA | C                | A                 | 680                 | 988                  | 1.45                | Avg when 50:50=  |       |                  | 32.17             | 35.83              |
| Het-2                                                                                                                                                                                      | R915L-CA | C                | A                 | 1707                | 2593                 | 1.52                | 1.49             |       |                  | 31.54             | 35.31              |
| Mut                                                                                                                                                                                        | R915L-CA | -                | A                 | -                   | 2410                 |                     |                  |       |                  | -                 | 35.73              |
| WT                                                                                                                                                                                         | R915L-CA | C                | -                 | 1140                | -                    |                     |                  |       |                  | 32.02             | -                  |
| S917I                                                                                                                                                                                      |          |                  |                   |                     |                      |                     |                  |       |                  |                   |                    |
| S917I-Forward: AACCTTCTGGACTTCCTTGCAAGA-G/T                                                                                                                                                |          |                  |                   |                     |                      |                     |                  |       |                  |                   |                    |
| Sample Name                                                                                                                                                                                | Marker   | Allele 1<br>(WT) | Allele 2<br>(Mut) | Peak Height<br>(WT) | Peak Height<br>(Mut) | Mut/WT Allele Ratio | Normalized Ratio | Avg   | Mut (% of Total) | Peak Size<br>(WT) | Peak Size<br>(Mut) |
| 26-Ca                                                                                                                                                                                      | S917I-GT | G                | T                 | 5951                | 5563                 | 0.935               | 1.154            | 1.188 | 54.30            | 33.17             | 36.45              |
| 26-Cb                                                                                                                                                                                      | S917I-GT | G                | T                 | 4063                | 4023                 | 0.990               | 1.222            |       |                  | 33.2              | 36.56              |
| 26-Da                                                                                                                                                                                      | S917I-GT | G                | T                 | 4514                | 265                  | 0.059               | 0.072            | 0.071 | 6.64             | 32.31             | 36.2               |
| 26-Db                                                                                                                                                                                      | S917I-GT | G                | T                 | 6911                | 390                  | 0.056               | 0.070            |       |                  | 32.01             | 36.11              |
| Het-1                                                                                                                                                                                      | S917I-GT | G                | T                 | 1933                | 1692                 | 0.88                | Avg when 50:50=  |       |                  | 33.24             | 36.49              |
| Het-2                                                                                                                                                                                      | S917I-GT | G                | T                 | 1842                | 1378                 | 0.75                | 0.81             |       |                  | 33.11             | 36.48              |
| Mut                                                                                                                                                                                        | S917I-GT | -                | T                 | -                   | 2687                 |                     |                  |       |                  | -                 | 36.46              |
| WT                                                                                                                                                                                         | S917I-GT | G                | -                 | 4171                | -                    |                     |                  |       |                  | 33.18             | -                  |
| Supplementary Table 2: SNaPshot data showing peak sizes (positions on the x-axis: mobility) and heights of wild-type (WT; black) and mutant (Mut; red) alleles.                            |          |                  |                   |                     |                      |                     |                  |       |                  |                   |                    |
| Ca: cDNA amplicon 1; Cb: cDNA amplicon 2; Da: DNA amplicon 1, Db: DNA amplicon 2                                                                                                           |          |                  |                   |                     |                      |                     |                  |       |                  |                   |                    |
| Yellow highlight: Plasmid-DNA Ctrl for: wild-type (WT), Mutant (Mut), and 50:50 ratio of wild-type:mutant alleles (Het-1 and 2)                                                            |          |                  |                   |                     |                      |                     |                  |       |                  |                   |                    |
| Mut/WT Allele Ratio= Peak height (Mut)/ Peak height (WT); Normalized Ratio= [(Mut/WT allele Ratio)/(Avg when 50:50)]; where Avg when 50:50= [Avg (Mut/WT Allele Ratio) from Het-1 & Het-2] |          |                  |                   |                     |                      |                     |                  |       |                  |                   |                    |
| Mutant (% of Total) = [Normalized Mut/Wt ratio X (100/(Normalized mut/wt ratio+1))]                                                                                                        |          |                  |                   |                     |                      |                     |                  |       |                  |                   |                    |

**Supplementary Table 3a:** Bioinformatic analyses of TIE2 mutations

| Nt change  | AA change | Predicted effect | dbSNP  | dbEST  | dbESE                    | POLYPHEN          | PANTHER (subSPEC value)                        |
|------------|-----------|------------------|--------|--------|--------------------------|-------------------|------------------------------------------------|
| c.2689 t>c | p.Y897H   | Missense         | Absent | Absent | No change                | Possibly damaging | High probability of deleterious effect (-3.96) |
| c.2690 a>c | p.Y897S   | Missense         | Absent | Absent | No change                | Probably damaging | High probability of deleterious effect (-3.77) |
| c.2690 a>t | p.Y897F   | Missense         | Absent | Absent | No change                | Benign            | Unlikely deleterious effect (-2.11)            |
| c.2690 a>g | p.Y897C   | Missense         | Absent | Absent | No change                | Probably damaging | High probability of deleterious effect (-4.96) |
| c.2740 c>t | p.L914F   | Missense         | Absent | Absent | No change                | Benign            | Possible deleterious effect (-3,21)            |
| c.2743 c>t | p.R915C   | Missense         | Absent | Absent | No change                | Probably damaging | High probability of deleterious effect (-5,3)  |
| c.2744 g>t | p.R915L   | Missense         | Absent | Absent | deletion of one ESE site | Probably damaging | High probability of deleterious effect (-3,91) |
| c.2750 g>t | p.S917I   | Missense         | Absent | Absent | (+) <sup>2</sup>         | Benign            | High probability of deleterious effect (-3,79) |

subSPEC value : substitution Position-Specific Evolutionary Conservation (<-3.5=high probability of deleterious functional effect; -2.5 to -3.5=possible deleterious functional effect;-2.5 to 2.5=unlikely functional effect; 2.5-3.5=possible gain-of-function effect; >3.5=high probability of gain-of-function effect)

**Supplementary Table 3b:** Conservation of amino acid residues Y897, L914, R915 and S917 across tyrosine kinase receptors in different species

|              | *                                 | ***               |
|--------------|-----------------------------------|-------------------|
|              | 897                               | 914<br>915<br>917 |
| TIE2_Human   | LGACEH-RGYLYLAIEYAPHGNLLDFLRKSRVL |                   |
| TIE2_Mouse   | LGACEH-RGYLYLAIEYAPHGNLLDFLRKSRVL |                   |
| TIE2_Bovin   | LGACEH-RGYLYLAIEYAPHGNLLDFLRKSRVL |                   |
| TIE2_Brare   | LGACEH-RGYLYLAIEFAPHGNLLDFLRKSRVL |                   |
| TIE1_Human   | LGACKN-RGYLYIAIEYAPYGNLLDFLRKSRVL |                   |
| TIE1_Mouse   | LGACEN-RGYLYIAIEYAPYGNLLDFLRKSRVL |                   |
| TIE1_Bovin   | LGACEN-RGYLYIAIEYAPYGNLLDFLRKSRVL |                   |
| FGFR1_Human  | LGACTQ-DGPLYVIVEYASKGNLREYLRARRP- |                   |
| FGFR2_Human  | LGACTQ-DGPLYVIVEYASKGNLREYLRARRP- |                   |
| FGFR3_Human  | LGACTQ-GGPLYVLVEYAAKGNLREFLRARRP- |                   |
| VEGFR1_Human | LGACTKQGGLMVIVEYCKYGNLSNYLKSKRDL  |                   |
| VEGFR2_Human | LGACTKPGGLMVIVEFCKFGNLSTYLRSKRNE  |                   |
| VEGFR3_Human | LGACTKPQGGLMVIVEFCKYGNLSNFLRAKRDA |                   |



## Supplementary Methods

**Computational analysis.** Each nucleotide change identified in the coding regions of *TIE2* was subjected to a series of bioinformatic analyses. First, dbSNP and dbEST were searched to detect known polymorphisms. Changes modifying an amino acid codon were submitted to PANTHER (<http://www.pantherdb.org>) and POLYPHEN (<http://www.bork.embl-heidelberg.de/PolyPhen/>) to estimate the likelihood of functional impact on the protein based on the position-specific evolutionary conservation in related proteins. RESCUE-ESE (Exonic Splicing Enhancer) was used to predict splicing alterations (<http://genes.mit.edu/burgelab/rescue-ese>).

**URLs.** The following URLs for the databases and softwares were used:

Online Mendelian Inheritance in Man (OMIM), <http://www.ncbi.nlm.nih.gov/Omim/>;  
University Of California-Santa Cruz (UCSC) Human Genome Bioinformatics, <http://genome.ucsc.edu/>;  
dbSNP, <http://www.ncbi.nlm.nih.gov/SNP/>;  
dbEST, <http://www.ncbi.nih.gov/EST/>;  
Exonic Splicing Enhancer (ESE), <http://genes.mit.edu/burgelab/rescue-ese/>;  
ClustalW, <http://www.ebi.ac.uk/clustalw/>;  
Ensembl, <http://www.ensembl.org>;  
PANTHER, <http://www.pantherdb.org>;  
POLYPHEN, <http://www.bork.embl-heidelberg.de/PolyPhen/>;  
ESE databases (Exonic Splicing Enhancer, <http://genes.mit.edu/burgelab/rescue-ese/>).

**Cos-7 Cell Culture and transfection.** Cos-7 cells were cultured at 37°C in 5% CO<sub>2</sub> in Dulbecco's modified Eagle's medium (DMEM; Invitrogen), supplemented with 10% (v/v) fetal bovine serum (Invitrogen) and Penicillin G 100 U/ml /Streptomycin 100 µg/ml (Cambrex Bioscience). They were transfected with full-length wild-type or mutant(s) TIE2

expression constructs using jetPEI (Polyplus-transfections SA), according to manufacturer's instructions. Co-transfections were done similarly, with different ratios of R849W and the deletion-mutant as indicated.

**Cell lysis.** Cells were washed with ice-cold PBS, and lysed in cold lysis buffer [(20 mM Hepes pH7.8, 75 mM KCl, 0.1 mM EDTA, 1 mM sodium-orthovanadate *or* 2 tablets of PhosStop phosphatase inhibitor tablets (Roche), 2 mM MgCl<sub>2</sub>, 1 mM DTT, 10% glycerol, 0.5% Triton-X 100 and 1 tablet of Complete Protease Inhibitor (Roche) per 20 ml]. Lysates were subjected to sonication and spun at 13000X g to remove debris.

**Western blot.** Supernatants were resolved on a polyacrylamide gel and immunoblotted with an anti-phospho-tyrosine antibody (PY99; Santa Cruz) at 1:400 [or anti-phospho-Tie2<sup>1102/1108</sup> (Ab-1, Calbiochem) at 1:2,500, in confirmatory blots], and stripped and re-probed with anti-TIE2 antibody (C-20; Santa Cruz Biotechnologies) at 1:500 dilution. Immunoreactive proteins were visualized using a goat anti-rabbit-HRP secondary antibody (for C-20 and Ab-1) at 1:25000 (Biosource) or a goat anti-mouse-HRP antibody (for PY99) at 1:20,000 (Biosource), with a femto-range-sensitive ECL detection system (Pierce).

**Densitometric image-quantification.** Densitometric analysis was carried out using ImageJ (<http://rsb.info.nih.gov/ij/>). Phosphotyrosine signals of bands were normalized to the corresponding total-TIE2 signals when stripped and re-probed, and the fold-differences of normalized (mutant) phosphorylation over that of wild-type TIE2 (run on the same gel) were calculated. Average fold-differences over WT observed across at least 3 separate blots per mutant form, were graphed.

**Ang1 binding and immunoprecipitation.** Transiently transfected Cos-7 cells in 6-well plates were incubated in serum-low (0.5% FCS) media for 3 hours, at 24 hours post-transfection. His-tagged Ang1 (R&D Systems) was added to wells at 1microg/mL in the media, and plates were incubated on ice at 4° for 30 minutes. Cells were lysed using 0.05M Tris-HCl, 0.15M NaCl, 1% NP40, 2mM EDTA, with 1 Complete tablet and 2 PhosStop tablets. Lysates were homogenized using 21G needles, and spun to remove debris. They were pre-cleared with 25 microL 50% Sepharose A beads (Sigma-Aldrich), and immunoprecipitated using 10microg/ml anti-His antibody with 25 microl Sepharose A beads. Direct immunoprecipitation of TIE2 was instead performed using anti-TIE2 (C-20, Santa Cruz; 2.5microg/ml). Western blot was performed as described, for anti-phosphotyrosine (PY99), followed by strip and reprobe for anti-TIE2.

**Quantification of fluorescence intensity in HUVEC retraction fibers.** To measure fluorescence intensity within retraction fibers, they were chosen as regions of interest (ROIs) using digitalized unsaturated confocal microscope images. For quantification, the fluorescence intensities of Cy2 and Cy3 immunofluorescences in ROIs were measured by Fluoview software.
